# Supplementary material for: (C2H5NH3)2BiCl5−xBrx perovskites containing 1D chains: effect of Br substitution on their structural and optical properties
Source: Royal Society of Chemistry journal article supplement (doi:10.1039/d3ce01019h), 2023-12-02
Supplement: d3ce01019h1.pdf [file d3ce01019h1.pdf]

## Supporting Information

### **(C<sub>2</sub>H<sub>5</sub>NH<sub>3</sub>)<sub>2</sub>BiCl<sub>5-x</sub>Br<sub>x</sub> Perovskites Containing 1D Chains: Effect of Br Substitution on Structural and Optical Properties**

Abinash Pradhan<sup>1</sup>, Sanand Sahoo<sup>2</sup>, Saroj L. Samal<sup>1,3\*</sup>

<sup>1</sup>Solid State and Materials Laboratory, Department of Chemistry, National Institute of  
Technology, Rourkela-769008, India

<sup>2</sup>Department of Physics and Astronomy, National Institute of Technology, Rourkela,  
Odisha -769008, India

<sup>3</sup>Center for Nanomaterials, National Institute of Technology, Rourkela-769008, India

**Table S1.** Selected bond angles of ethyl ammine unit as well as X–Bi–X unit of  $(\text{C}_2\text{H}_5\text{NH}_3)_2\text{BiCl}_{5-x}\text{Br}_x$  at RT and LT.

| $(\text{C}_2\text{H}_5\text{NH}_3)_2\text{BiCl}_{5-x}\text{Br}_x$ | Space Group | C1–C2–N1 bond angle (degree)<br>Ordered | C3–C4–N2 bond angle (degree)<br>Disordered | Bi–Cl/Br–Bi bridged bond angle (degree) |
|-------------------------------------------------------------------|-------------|-----------------------------------------|--------------------------------------------|-----------------------------------------|
| $x=0$                                                             | C m c a     | 123.17                                  | 110.62                                     | 162.71                                  |
|                                                                   | P b c a     | 112.163                                 | 110.49                                     | 150.17                                  |
|                                                                   | A b a 2     | 110.059                                 | 110.599                                    | 148.332                                 |
| $x=1$                                                             | C m c a     | 120.57                                  | 110.68                                     | 164.62                                  |
|                                                                   | A b a 2     | 115.005                                 | 115.685                                    | 150.211                                 |
| $x=2$                                                             | C m c a     | 119.10                                  | 110.65                                     | 165.21                                  |
|                                                                   | A b a 2     | 131.534                                 | 112.695                                    | 155.647                                 |
| $x=3$                                                             | C m c a     | 118.77                                  | 110.66                                     | 165.06                                  |
| $x=5$                                                             | C m c a     | 118.61                                  | 110.67                                     | 164.30                                  |
|                                                                   | A b a 2     | 111.67                                  | 114.882                                    | 164.472                                 |

**Table S2:** Hydrogen bond distances (Å) of selected bonds in  $(\text{C}_2\text{H}_5\text{NH}_3)_2\text{BiCl}_{5-x}\text{Br}_x$  compounds.

| $x$          | N1–H–(Cl/Br)3 | N2–H–(Cl/Br)2/(Cl/Br)5 |
|--------------|---------------|------------------------|
| 0            | 2.86          | 2.72                   |
| 1.185        | 2.94          | 2.77                   |
| 2.27         | 2.97          | 2.83                   |
| 3.125        | 2.99          | 2.92                   |
| 5            | 3.02          | 2.84                   |
| 0_LT (90 K)  | 2.40          | 2.43                   |
| 0_LT (160 K) | 2.45          | 2.42                   |
| 1.15_LT      | 2.75          | 2.87                   |
| 2.12_LT      | 2.79          | 3.10                   |
| 5_LT         | 2.84          | 3.15                   |

**Table S3.** Bond length of different kind of Bi–Br bond (Å) in (EA)<sub>2</sub>BiCl<sub>5-x</sub>Br<sub>x</sub>

| Composition | Space Group | Bi–X1 | Bi–X2 | Bi–X3 | Bi–X4 | Bi–X5 |
|-------------|-------------|-------|-------|-------|-------|-------|
| $x = 0$     | C m c a     | 2.58  | 2.68  | 2.70  | 2.84  |       |
|             | P b c a     | 2.54  | 2.59  | 2.68  | 2.83  | 2.71  |
|             | A b a 2     | 2.53  | 2.59  | 2.68  | 2.83  | 2.71  |
| $x = 1$     | C m c a     | 2.636 | 2.725 | 2.765 | 2.858 |       |
|             | A b a 2     | 2.60  | 2.60  | 2.71  | 2.85  | 2.78  |
| $x = 2$     | C m c a     | 2.668 | 2.756 | 2.793 | 2.883 |       |
|             | A b a 2     | 2.68  | 2.65  | 2.74  | 2.90  | 2.81  |
| $x = 3$     | C m c a     | 2.693 | 2.783 | 2.812 | 2.920 |       |
| $x = 5$     | C m c a     | 2.715 | 2.822 | 2.83  | 3.004 |       |
|             | A b a 2     | 2.73  | 2.69  | 2.82  | 3.00  | 2.84  |

**Table S4.** Polyhedral tilting angle in the (C<sub>2</sub>H<sub>5</sub>NH<sub>3</sub>)<sub>2</sub>BiCl<sub>5-x</sub>Br<sub>x</sub> compounds.

| $x$ | RT_Tilt angle (°) | LT_Tilt angle (°)           |
|-----|-------------------|-----------------------------|
| 0   | 76                | 71.97 (90 K), 72.22 (160 K) |
| 1   | 76.74             | 72.33                       |
| 2   | 77.20             | 75.48                       |
| 3   | 77.42             | -----                       |
| 5   | 77.50             | 77.50                       |

**Table S5:** Elemental analysis of (C<sub>2</sub>H<sub>5</sub>NH<sub>3</sub>)<sub>2</sub>BiCl<sub>5-x</sub>Br<sub>x</sub> compounds from EDX spectra.

| Loaded Composition                                                                              | EDX Composition                                                                                               |
|-------------------------------------------------------------------------------------------------|---------------------------------------------------------------------------------------------------------------|
| (C <sub>2</sub> H <sub>5</sub> NH <sub>3</sub> ) <sub>2</sub> BiCl <sub>5</sub>                 | (C <sub>2</sub> H <sub>5</sub> NH <sub>3</sub> ) <sub>2</sub> BiCl <sub>4.67(01)</sub>                        |
| (C <sub>2</sub> H <sub>5</sub> NH <sub>3</sub> ) <sub>2</sub> BiCl <sub>4</sub> Br              | (C <sub>2</sub> H <sub>5</sub> NH <sub>3</sub> ) <sub>2</sub> BiCl <sub>3.8(02)</sub> Br <sub>1.1(01)</sub>   |
| (C <sub>2</sub> H <sub>5</sub> NH <sub>3</sub> ) <sub>2</sub> BiCl <sub>3</sub> Br <sub>2</sub> | (C <sub>2</sub> H <sub>5</sub> NH <sub>3</sub> ) <sub>2</sub> BiCl <sub>2.56(01)</sub> Br <sub>2.14(01)</sub> |
| (C <sub>2</sub> H <sub>5</sub> NH <sub>3</sub> ) <sub>2</sub> BiCl <sub>2</sub> Br <sub>3</sub> | (C <sub>2</sub> H <sub>5</sub> NH <sub>3</sub> ) <sub>2</sub> BiCl <sub>1.65(02)</sub> Br <sub>3.23(01)</sub> |
| (C <sub>2</sub> H <sub>5</sub> NH <sub>3</sub> ) <sub>2</sub> BiBr <sub>5</sub>                 | (C <sub>2</sub> H <sub>5</sub> NH <sub>3</sub> ) <sub>2</sub> BiBr <sub>5.06(03)</sub>                        |

**Table S6:** Atomic positions obtained from Single Crystals of  $(\text{C}_2\text{H}_5\text{NH}_3)_2\text{BiCl}_{5-x}\text{Br}_x$ .

| $x = 0$ |       |      |        |            |             |             |                      |
|---------|-------|------|--------|------------|-------------|-------------|----------------------|
| Atom    | Wyck. | Site | S.O.F. | x/a        | y/b         | z/c         | U [ $\text{\AA}^2$ ] |
| Bi1     | 8f    | m..  |        | 1/2        | 0.36404(2)  | 0.36630(2)  |                      |
| Cl1     | 16g   | 1    |        | 0.7515(2)  | 0.37926(8)  | 0.46200(11) |                      |
| Cl2     | 8f    | m..  |        | 1/2        | 0.24584(10) | 0.40254(16) |                      |
| Cl3     | 8f    | m..  |        | 1/2        | 0.48324(10) | 0.33111(15) |                      |
| Cl4     | 8e    | .2.  |        | 1/4        | 0.34464(16) | 1/4         |                      |
| N2      | 8f    | m..  |        | 1/2        | 0.4676(3)   | 0.1490(4)   |                      |
| H2A     | 8f    | m..  | 0.5    | 1/2        | 0.43849     | 0.11424     | 0.1050               |
| H2B     | 16g   | 1    | 0.5    | 0.59607    | 0.46398     | 0.17746     | 0.1050               |
| H2C     | 16g   | 1    | 0.5    | 0.40393    | 0.46398     | 0.17746     | 0.1050               |
| C3      | 8f    | m..  |        | 1/2        | 0.5785(6)   | 0.1488(7)   |                      |
| H3A     | 8f    | m..  | 0.5    | 1/2        | 0.61189     | 0.11404     | 0.3300               |
| H3B     | 16g   | 1    | 0.5    | 0.39637    | 0.58068     | 0.17976     | 0.3300               |
| H3C     | 16g   | 1    | 0.5    | 0.60363    | 0.58068     | 0.17976     | 0.3300               |
| C4      | 8f    | m..  |        | 1/2        | 0.5277(7)   | 0.1121(7)   |                      |
| H4A     | 16g   | 1    | 0.5    | 0.60277    | 0.52863     | 0.07956     | 0.1850               |
| H4B     | 16g   | 1    | 0.5    | 0.39723    | 0.52863     | 0.07956     | 0.1850               |
| C1      | 16g   | 1    | 0.5    | 0.4531(16) | 0.3260(6)   | 0.6862(7)   |                      |
| H1A     | 16g   | 1    | 0.5    | 0.51744    | 0.35992     | 0.70633     | 0.1500               |
| H1B     | 16g   | 1    | 0.5    | 0.34062    | 0.33969     | 0.66783     | 0.1500               |
| H1C     | 16g   | 1    | 0.5    | 0.43510    | 0.29623     | 0.72487     | 0.1500               |
| C2      | 16g   | 1    | 0.5    | 0.5585(15) | 0.2975(7)   | 0.6218(7)   |                      |
| H2D     | 16g   | 1    | 0.5    | 0.57819    | 0.32774     | 0.58303     | 0.1740               |
| H2E     | 16g   | 1    | 0.5    | 0.67283    | 0.28421     | 0.64017     | 0.1740               |
| N1      | 16g   | 1    | 0.5    | 0.4596(14) | 0.2436(5)   | 0.5889(6)   |                      |
| H1D     | 16g   | 1    | 0.5    | 0.52255    | 0.22766     | 0.55156     | 0.1680               |
| H1E     | 16g   | 1    | 0.5    | 0.44297    | 0.21572     | 0.62429     | 0.1680               |
| H1F     | 16g   | 1    | 0.5    | 0.35538    | 0.25600     | 0.57141     | 0.1680               |

| $x = 1.185$ |       |      |        |             |             |             |                      |
|-------------|-------|------|--------|-------------|-------------|-------------|----------------------|
| Atom        | Wyck. | Site | S.O.F. | x/a         | y/b         | z/c         | U [ $\text{\AA}^2$ ] |
| Bi1         | 8f    | m..  |        | 1/2         | 0.36490(2)  | 0.36705(2)  |                      |
| Cl1         | 16g   | 1    | 0.737  | 0.75219(17) | 0.37930(7)  | 0.46605(8)  |                      |
| Cl3         | 8f    | m..  | 0.693  | 1/2         | 0.48735(9)  | 0.33546(12) |                      |
| Cl2         | 8f    | m..  | 0.756  | 1/2         | 0.24474(9)  | 0.40033(14) |                      |
| Cl4         | 8e    | .2.  | 0.89   | 1/4         | 0.34758(15) | 1/4         |                      |
| N2          | 8f    | m..  |        | 1/2         | 0.4680(4)   | 0.1500(4)   |                      |
| H2A         | 8f    | m..  | 0.5    | 1/2         | 0.43827     | 0.11641     | 0.1050               |
| H2B         | 16g   | 1    | 0.5    | 0.59516     | 0.46511     | 0.17845     | 0.1050               |
| H2C         | 16g   | 1    | 0.5    | 0.40484     | 0.46511     | 0.17845     | 0.1050               |
| C3          | 8f    | m..  |        | 1/2         | 0.5774(6)   | 0.1506(7)   |                      |
| H3A         | 8f    | m..  | 0.5    | 1/2         | 0.61099     | 0.11666     | 0.2800               |
| H3B         | 16g   | 1    | 0.5    | 0.39736     | 0.57914     | 0.18153     | 0.2800               |
| H3C         | 16g   | 1    | 0.5    | 0.60264     | 0.57914     | 0.18153     | 0.2800               |
| C4          | 8f    | m..  |        | 1/2         | 0.5257(7)   | 0.1118(8)   |                      |

|     |     |     |       |             |             |             |        |
|-----|-----|-----|-------|-------------|-------------|-------------|--------|
| H4A | 16g | 1   | 0.5   | 0.60199     | 0.52639     | 0.07953     | 0.1790 |
| H4B | 16g | 1   | 0.5   | 0.39801     | 0.52639     | 0.07953     | 0.1790 |
| Br4 | 8e  | .2. | 0.11  | 1/4         | 0.34758(15) | 1/4         |        |
| Br2 | 8f  | m.. | 0.244 | 1/2         | 0.24474(9)  | 0.40033(14) |        |
| Br1 | 16g | 1   | 0.263 | 0.75219(17) | 0.37930(7)  | 0.46605(8)  |        |
| Br3 | 8f  | m.. | 0.307 | 1/2         | 0.48735(9)  | 0.33546(12) |        |
| N1  | 16g | 1   | 0.5   | 0.4587(16)  | 0.2443(7)   | 0.5900(7)   |        |
| H1A | 16g | 1   | 0.5   | 0.52276     | 0.22804     | 0.55364     | 0.1480 |
| H1B | 16g | 1   | 0.5   | 0.43945     | 0.21671     | 0.62532     | 0.1480 |
| H1C | 16g | 1   | 0.5   | 0.35678     | 0.25677     | 0.57146     | 0.1480 |
| C2  | 16g | 1   | 0.5   | 0.5568(15)  | 0.2981(8)   | 0.6238(7)   |        |
| H2D | 16g | 1   | 0.5   | 0.66863     | 0.28465     | 0.64340     | 0.1780 |
| H2E | 16g | 1   | 0.5   | 0.57932     | 0.32794     | 0.58521     | 0.1780 |
| C1  | 16g | 1   | 0.5   | 0.4504(18)  | 0.3268(7)   | 0.6862(7)   |        |
| H1D | 16g | 1   | 0.5   | 0.51381     | 0.36041     | 0.70663     | 0.1910 |
| H1E | 16g | 1   | 0.5   | 0.34043     | 0.34066     | 0.66658     | 0.1910 |
| H1F | 16g | 1   | 0.5   | 0.42960     | 0.29744     | 0.72467     | 0.1910 |

| $x = 2.27$ |       |      |        |             |             |             |                     |
|------------|-------|------|--------|-------------|-------------|-------------|---------------------|
| Atom       | Wyck. | Site | S.O.F. | x/a         | y/b         | z/c         | U [Å <sup>2</sup> ] |
| Bi1        | 8f    | m..  |        | 1/2         | 0.36565(2)  | 0.63207(2)  |                     |
| Cl1        | 16g   | 1    | 0.503  | 0.24687(18) | 0.37941(7)  | 0.53193(8)  |                     |
| Cl3        | 8f    | m..  | 0.499  | 1/2         | 0.48891(9)  | 0.66264(12) |                     |
| Cl2        | 8f    | m..  | 0.518  | 1/2         | 0.24411(9)  | 0.60112(14) |                     |
| Cl4        | 8e    | .2.  | 0.718  | 3/4         | 0.34895(15) | 3/4         |                     |
| Br3        | 8f    | m..  | 0.501  | 1/2         | 0.48891(9)  | 0.66264(12) |                     |
| Br1        | 16g   | 1    | 0.497  | 0.24687(18) | 0.37941(7)  | 0.53193(8)  |                     |
| Br4        | 8e    | .2.  | 0.282  | 3/4         | 0.34895(15) | 3/4         |                     |
| Br2        | 8f    | m..  | 0.482  | 1/2         | 0.24411(9)  | 0.60112(14) |                     |
| N2         | 8f    | m..  |        | 1/2         | 0.4676(5)   | 0.8490(5)   |                     |
| H2A        | 8f    | m..  | 0.5    | 1/2         | 0.43753     | 0.88168     | 0.1070              |
| H2B        | 16g   | 1    | 0.5    | 0.40557     | 0.46521     | 0.82048     | 0.1070              |
| H2C        | 16g   | 1    | 0.5    | 0.59443     | 0.46521     | 0.82048     | 0.1070              |
| C4         | 8f    | m..  |        | 1/2         | 0.5242(8)   | 0.8881(9)   |                     |
| H4A        | 16g   | 1    | 0.5    | 0.39866     | 0.52477     | 0.92027     | 0.1680              |
| H4B        | 16g   | 1    | 0.5    | 0.60134     | 0.52477     | 0.92027     | 0.1680              |
| C3         | 8f    | m..  |        | 1/2         | 0.5762(7)   | 0.8483(8)   |                     |
| H3A        | 8f    | m..  | 0.5    | 1/2         | 0.60987     | 0.88182     | 0.2420              |
| H3B        | 16g   | 1    | 0.5    | 0.60186     | 0.57771     | 0.81750     | 0.2420              |
| H3C        | 16g   | 1    | 0.5    | 0.39814     | 0.57771     | 0.81750     | 0.2420              |
| C1         | 16g   | 1    | 0.5    | 0.5510(19)  | 0.3257(8)   | 0.3153(9)   |                     |
| H1A        | 16g   | 1    | 0.5    | 0.48403     | 0.35757     | 0.29336     | 0.1480              |
| H1B        | 16g   | 1    | 0.5    | 0.65362     | 0.34221     | 0.33787     | 0.1480              |
| H1C        | 16g   | 1    | 0.5    | 0.58366     | 0.29738     | 0.27744     | 0.1480              |
| C2         | 16g   | 1    | 0.5    | 0.4420(16)  | 0.2938(9)   | 0.3748(11)  |                     |
| H2D        | 16g   | 1    | 0.5    | 0.40755     | 0.32254     | 0.41271     | 0.1780              |
| H2E        | 16g   | 1    | 0.5    | 0.33747     | 0.27764     | 0.35219     | 0.1780              |
| N1         | 16g   | 1    | 0.5    | 0.5448(17)  | 0.2431(8)   | 0.4106(9)   |                     |

|     |     |   |     |         |         |         |        |
|-----|-----|---|-----|---------|---------|---------|--------|
| H1D | 16g | 1 | 0.5 | 0.47970 | 0.22505 | 0.44494 | 0.1860 |
| H1E | 16g | 1 | 0.5 | 0.57509 | 0.21646 | 0.37586 | 0.1860 |
| H1F | 16g | 1 | 0.5 | 0.63996 | 0.25802 | 0.43188 | 0.1860 |

| $x = 3.125$ |       |      |        |             |             |             |                      |
|-------------|-------|------|--------|-------------|-------------|-------------|----------------------|
| Atom        | Wyck. | Site | S.O.F. | x/a         | y/b         | z/c         | U [ $\text{\AA}^2$ ] |
| Bi1         | 8f    | m..  |        | 1/2         | 0.36660(2)  | 0.63095(2)  |                      |
| Cl1         | 16g   | 1    | 0.336  | 0.24574(13) | 0.37968(5)  | 0.53074(6)  |                      |
| Cl3         | 8f    | m..  | 0.308  | 1/2         | 0.49012(6)  | 0.66152(9)  |                      |
| Cl2         | 8f    | m..  | 0.327  | 1/2         | 0.24416(6)  | 0.60147(10) |                      |
| Cl4         | 8e    | .2.  | 0.568  | 3/4         | 0.34957(10) | 3/4         |                      |
| C1          | 8f    | m..  |        | 0           | 0.5756(6)   | 0.6512(7)   |                      |
| H1A         | 8f    | m..  | 0.5    | 0           | 0.60882     | 0.61736     | 0.2200               |
| H1B         | 16g   | 1    | 0.5    | -0.10092    | 0.57743     | 0.68183     | 0.2200               |
| H1C         | 16g   | 1    | 0.5    | 0.10092     | 0.57743     | 0.68183     | 0.2200               |
| N1          | 8f    | m..  |        | 0           | 0.4681(4)   | 0.6519(5)   |                      |
| H1D         | 8f    | m..  | 0.5    | 0           | 0.43773     | 0.61995     | 0.1110               |
| H1E         | 16g   | 1    | 0.5    | 0.09356     | 0.46608     | 0.68027     | 0.1110               |
| H1F         | 16g   | 1    | 0.5    | -0.09356    | 0.46608     | 0.68027     | 0.1110               |
| C2          | 8f    | m..  |        | 0           | 0.5233(6)   | 0.6122(8)   |                      |
| H2A         | 16g   | 1    | 0.5    | 0.10043     | 0.52350     | 0.58020     | 0.1570               |
| H2B         | 16g   | 1    | 0.5    | -0.10043    | 0.52350     | 0.58020     | 0.1570               |
| Br1         | 16g   | 1    | 0.664  | 0.24574(13) | 0.37968(5)  | 0.53074(6)  |                      |
| Br3         | 8f    | m..  | 0.692  | 1/2         | 0.49012(6)  | 0.66152(9)  |                      |
| Br4         | 8e    | .2.  | 0.432  | 3/4         | 0.34957(10) | 3/4         |                      |
| Br2         | 8f    | m..  | 0.673  | 1/2         | 0.24416(6)  | 0.60147(10) |                      |
| N2          | 16g   | 1    | 0.5    | 0.9548(16)  | 0.7446(7)   | 0.4109(8)   |                      |
| H2C         | 16g   | 1    | 0.5    | 1.02129     | 0.72581     | 0.44358     | 0.1570               |
| H2D         | 16g   | 1    | 0.5    | 0.86725     | 0.76201     | 0.43435     | 0.1570               |
| H2E         | 16g   | 1    | 0.5    | 0.91431     | 0.71835     | 0.37812     | 0.1570               |
| C4          | 16g   | 1    | 0.5    | 1.0606(15)  | 0.7924(9)   | 0.3704(10)  |                      |
| H4A         | 16g   | 1    | 0.5    | 1.10617     | 0.82081     | 0.40615     | 0.1950               |
| H4B         | 16g   | 1    | 0.5    | 1.15702     | 0.77363     | 0.34539     | 0.1950               |
| C3          | 16g   | 1    | 0.5    | 0.950(2)    | 0.8254(8)   | 0.3141(9)   |                      |
| H3A         | 16g   | 1    | 0.5    | 1.01841     | 0.85512     | 0.28935     | 0.1910               |
| H3B         | 16g   | 1    | 0.5    | 0.90641     | 0.79738     | 0.27837     | 0.1910               |
| H3C         | 16g   | 1    | 0.5    | 0.85565     | 0.84447     | 0.33903     | 0.1910               |

| $x = 5$ |       |      |        |             |            |             |                      |
|---------|-------|------|--------|-------------|------------|-------------|----------------------|
| Atom    | Wyck. | Site | S.O.F. | x/a         | y/b        | z/c         | U [ $\text{\AA}^2$ ] |
| Bi1     | 8f    | m..  |        | 1/2         | 0.63140(2) | 0.62777(3)  |                      |
| Br1     | 16g   | 1    |        | 0.24396(13) | 0.61826(5) | 0.52956(6)  |                      |
| Br2     | 8f    | m..  |        | 1/2         | 0.75513(6) | 0.59895(11) |                      |
| Br3     | 8f    | m..  |        | 1/2         | 0.50771(7) | 0.66096(10) |                      |
| Br4     | 8e    | .2.  |        | 3/4         | 0.64968(8) | 3/4         |                      |
| N1      | 8f    | m..  |        | 1/2         | 0.5311(5)  | 0.8469(7)   |                      |
| H1A     | 8f    | m..  | 0.5    | 1/2         | 0.56132    | 0.87849     | 0.0990               |

|     |     |     |     |           |            |            |        |
|-----|-----|-----|-----|-----------|------------|------------|--------|
| H1B | 16g | 1   | 0.5 | 0.59206   | 0.53311    | 0.81879    | 0.0990 |
| H1C | 16g | 1   | 0.5 | 0.40795   | 0.53311    | 0.81879    | 0.0990 |
| C2  | 8f  | m.. |     | 1/2       | 0.4753(8)  | 0.8867(11) |        |
| H2A | 16g | 1   | 0.5 | 0.59883   | 0.47506    | 0.91834    | 0.1550 |
| H2B | 16g | 1   | 0.5 | 0.40117   | 0.47506    | 0.91834    | 0.1550 |
| C1  | 8f  | m.. |     | 1/2       | 0.4228(7)  | 0.8475(10) |        |
| H1D | 8f  | m.. | 0.5 | 1/2       | 0.38964    | 0.88077    | 0.2210 |
| H1E | 16g | 1   | 0.5 | 0.40071   | 0.42111    | 0.81713    | 0.2210 |
| H1F | 16g | 1   | 0.5 | 0.59930   | 0.42111    | 0.81713    | 0.2210 |
| N2  | 16g | 1   | 0.5 | -0.044(2) | 0.7421(9)  | 0.5933(11) |        |
| H2C | 16g | 1   | 0.5 | 0.01638   | 0.72591    | 0.55706    | 0.1510 |
| H2D | 16g | 1   | 0.5 | -0.05916  | 0.71514    | 0.62856    | 0.1510 |
| H2E | 16g | 1   | 0.5 | -0.14365  | 0.75394    | 0.57619    | 0.1510 |
| C4  | 16g | 1   | 0.5 | 0.052(2)  | 0.7958(10) | 0.6245(12) |        |
| H4A | 16g | 1   | 0.5 | 0.16196   | 0.78302    | 0.64257    | 0.1770 |
| H4B | 16g | 1   | 0.5 | 0.07066   | 0.82494    | 0.58599    | 0.1770 |
| C3  | 16g | 1   | 0.5 | -0.047(3) | 0.8243(10) | 0.6866(12) |        |
| H3A | 16g | 1   | 0.5 | 0.01441   | 0.85787    | 0.70548    | 0.1940 |
| H3B | 16g | 1   | 0.5 | -0.15535  | 0.83749    | 0.66855    | 0.1940 |
| H3C | 16g | 1   | 0.5 | -0.06421  | 0.79564    | 0.72503    | 0.1940 |

| <b>x = 0 (160 K)</b> |              |             |               |             |             |            |        |
|----------------------|--------------|-------------|---------------|-------------|-------------|------------|--------|
| <b>Atom</b>          | <b>Wyck.</b> | <b>Site</b> | <b>S.O.F.</b> | <b>x/a</b>  | <b>y/b</b>  | <b>z/c</b> |        |
| Bi1                  | 8c           | 1           | 0.63201(2)    | 0.49449(3)  | 0.63487(2)  |            |        |
| Cl1                  | 8c           | 1           | 0.52648(14)   | 0.7251(3)   | 0.62031(11) |            |        |
| Cl2                  | 8c           | 1           | 0.54651(14)   | 0.2186(3)   | 0.61245(10) |            |        |
| Cl3                  | 8c           | 1           | 0.59196(15)   | 0.4539(3)   | 0.75113(12) |            |        |
| Cl4                  | 8c           | 1           | 0.72909(14)   | 0.7901(3)   | 0.65968(13) |            |        |
| Cl5                  | 8c           | 1           | 0.66989(18)   | 0.5203(3)   | 0.51643(13) |            |        |
| N2                   | 8c           | 1           | 0.8511(6)     | 0.4616(10)  | 0.5264(4)   |            |        |
| H2A                  | 8c           | 1           | 0.87690       | 0.49159     | 0.55947     |            | 0.0440 |
| H2B                  | 8c           | 1           | 0.80541       | 0.51299     | 0.52725     |            | 0.0440 |
| H2C                  | 8c           | 1           | 0.84579       | 0.34287     | 0.52494     |            | 0.0440 |
| N1                   | 8c           | 1           | 0.5951(6)     | 0.0082(8)   | 0.7371(4)   |            |        |
| H1A                  | 8c           | 1           | 0.55165       | -0.04062    | 0.72453     |            | 0.0370 |
| H1B                  | 8c           | 1           | 0.59020       | 0.12702     | 0.73834     |            | 0.0370 |
| H1C                  | 8c           | 1           | 0.63235       | -0.02092    | 0.71169     |            | 0.0370 |
| C4                   | 8c           | 1           | 0.8935(10)    | 0.5240(14)  | 0.4720(7)   |            |        |
| H4A                  | 8c           | 1           | 0.94362       | 0.46936     | 0.47136     |            | 0.0640 |
| H4B                  | 8c           | 1           | 0.89999       | 0.65319     | 0.47385     |            | 0.0640 |
| C2                   | 8c           | 1           | 0.6135(6)     | -0.0597(14) | 0.7980(5)   |            |        |
| H2D                  | 8c           | 1           | 0.61778       | -0.18947    | 0.79655     |            | 0.0470 |
| H2E                  | 8c           | 1           | 0.57229       | -0.02983    | 0.82531     |            | 0.0470 |
| C3                   | 8c           | 1           | 0.8507(11)    | 0.4744(16)  | 0.4150(8)   |            |        |
| H3A                  | 8c           | 1           | 0.87868       | 0.51544     | 0.38047     |            | 0.1170 |
| H3B                  | 8c           | 1           | 0.84494       | 0.34640     | 0.41301     |            | 0.1170 |
| H3C                  | 8c           | 1           | 0.80139       | 0.52990     | 0.41550     |            | 0.1170 |
| C1                   | 8c           | 1           | 0.6868(10)    | 0.0181(13)  | 0.8220(8)   |            |        |

|     |    |   |         |          |         |        |
|-----|----|---|---------|----------|---------|--------|
| H1D | 8c | 1 | 0.69662 | -0.02937 | 0.86150 | 0.0980 |
| H1E | 8c | 1 | 0.72795 | -0.01323 | 0.79550 | 0.0980 |
| H1F | 8c | 1 | 0.68248 | 0.14634  | 0.82425 | 0.0980 |

| <b><math>x = 0</math> (90 K)</b> |       |      |        |             |             |            |                      |
|----------------------------------|-------|------|--------|-------------|-------------|------------|----------------------|
| Atom                             | Wyck. | Site | S.O.F. | x/a         | y/b         | z/c        | U [ $\text{\AA}^2$ ] |
| Bi1                              | 8b    | 1    |        | 0.63322(2)  | 0.63702(2)  | 0.63507(6) |                      |
| Cl1                              | 8b    | 1    |        | 0.52662(15) | 0.62159(15) | 0.8595(4)  |                      |
| Cl2                              | 8b    | 1    |        | 0.54935(16) | 0.6140(2)   | 0.3580(4)  |                      |
| Cl3                              | 8b    | 1    |        | 0.59224(13) | 0.75552(12) | 0.5925(3)  |                      |
| Cl4                              | 8b    | 1    |        | 0.72653(14) | 0.66254(13) | 0.9362(4)  |                      |
| Cl5                              | 8b    | 1    |        | 0.67116(15) | 0.51598(11) | 0.6655(6)  |                      |
| N1                               | 8b    | 1    |        | 0.5941(4)   | 0.7425(4)   | 0.1553(15) |                      |
| H1A                              | 8b    | 1    |        | 0.55079     | 0.72973     | 0.10583    | 0.0350               |
| H1B                              | 8b    | 1    |        | 0.63033     | 0.71455     | 0.13605    | 0.0350               |
| H1C                              | 8b    | 1    |        | 0.58742     | 0.74730     | 0.27229    | 0.0350               |
| C2                               | 8b    | 1    |        | 0.6913(5)   | 0.8241(5)   | 0.160(2)   |                      |
| H2A                              | 8b    | 1    |        | 0.70562     | 0.86272     | 0.10668    | 0.0500               |
| H2B                              | 8b    | 1    |        | 0.68435     | 0.82949     | 0.28586    | 0.0500               |
| H2C                              | 8b    | 1    |        | 0.73064     | 0.79416     | 0.13891    | 0.0500               |
| C1                               | 8b    | 1    |        | 0.6167(6)   | 0.8015(5)   | 0.0758(16) |                      |
| H1D                              | 8b    | 1    |        | 0.57700     | 0.83184     | 0.09524    | 0.0360               |
| H1E                              | 8b    | 1    |        | 0.62338     | 0.79643     | -0.05202   | 0.0360               |
| C4                               | 8b    | 1    |        | 0.6462(7)   | 0.4168(5)   | 0.197(4)   |                      |
| H4A                              | 8b    | 1    |        | 0.61398     | 0.38460     | 0.24195    | 0.1710               |
| H4B                              | 8b    | 1    |        | 0.66851     | 0.40377     | 0.08578    | 0.1710               |
| H4C                              | 8b    | 1    |        | 0.68580     | 0.42530     | 0.28152    | 0.1710               |
| C3                               | 8b    | 1    |        | 0.5989(5)   | 0.4752(5)   | 0.166(3)   |                      |
| H3A                              | 8b    | 1    |        | 0.55848     | 0.46648     | 0.08136    | 0.1340               |
| H3B                              | 8b    | 1    |        | 0.57580     | 0.48805     | 0.27744    | 0.1340               |
| N2                               | 8b    | 1    |        | 0.6486(4)   | 0.5270(3)   | 0.0940(13) |                      |
| H2D                              | 8b    | 1    |        | 0.62031     | 0.56055     | 0.07684    | 0.0330               |
| H2E                              | 8b    | 1    |        | 0.68531     | 0.53535     | 0.17225    | 0.0330               |
| H2F                              | 8b    | 1    |        | 0.66928     | 0.51539     | -0.00922   | 0.0330               |

| <b><math>x = 1.15</math> (90 K)</b> |       |      |        |             |             |            |                      |
|-------------------------------------|-------|------|--------|-------------|-------------|------------|----------------------|
| Atom                                | Wyck. | Site | S.O.F. | x/a         | y/b         | z/c        | U [ $\text{\AA}^2$ ] |
| Bi1                                 | 8b    | 1    |        | 0.63222(2)  | 0.63517(2)  | 0.6418(4)  |                      |
| Br5                                 | 8b    | 1    | 0.359  | 0.66604(14) | 0.51130(11) | 0.6301(12) |                      |
| Br3                                 | 8b    | 1    | 0.22   | 0.59405(15) | 0.75471(13) | 0.648(2)   |                      |
| Br2                                 | 8b    | 1    | 0.3    | 0.5295(4)   | 0.6207(4)   | 0.3954(8)  |                      |
| Br4                                 | 8b    | 1    | 0.03   | 0.7280(2)   | 0.6585(2)   | 0.3416(6)  |                      |
| N008                                | 8b    | 1    |        | 0.5945(8)   | 0.7418(6)   | 0.130(5)   |                      |
| H00A                                | 8b    | 1    |        | 0.55116     | 0.73098     | 0.18206    | 0.0620               |
| H00B                                | 8b    | 1    |        | 0.58776     | 0.74445     | 0.01325    | 0.0620               |
| H00C                                | 8b    | 1    |        | 0.62991     | 0.71400     | 0.15366    | 0.0620               |
| N009                                | 8b    | 1    |        | 0.6478(7)   | 0.5266(6)   | 0.165(5)   |                      |



|      |    |   |      |             |             |          |        |
|------|----|---|------|-------------|-------------|----------|--------|
| H00G | 8b | 1 |      | 0.61693     | 0.55785     | 0.18591  | 0.0580 |
| H00H | 8b | 1 |      | 0.68223     | 0.52430     | 0.25157  | 0.0580 |
| H00I | 8b | 1 |      | 0.67099     | 0.53187     | 0.06118  | 0.0580 |
| C00A | 8b | 1 |      | 0.6889(9)   | 0.8226(8)   | 0.124(6) |        |
| H00D | 8b | 1 |      | 0.70055     | 0.86128     | 0.17697  | 0.0830 |
| H00E | 8b | 1 |      | 0.72908     | 0.79438     | 0.14941  | 0.0830 |
| H00F | 8b | 1 |      | 0.68362     | 0.82722     | -0.00204 | 0.0830 |
| C00B | 8b | 1 |      | 0.6460(9)   | 0.4198(9)   | 0.129(9) |        |
| H00J | 8b | 1 |      | 0.61231     | 0.38546     | 0.12877  | 0.1420 |
| H00K | 8b | 1 |      | 0.67106     | 0.42274     | 0.01631  | 0.1420 |
| H00L | 8b | 1 |      | 0.68319     | 0.41458     | 0.22166  | 0.1420 |
| C00C | 8b | 1 |      | 0.6052(12)  | 0.4722(9)   | 0.161(9) |        |
| H00M | 8b | 1 |      | 0.57897     | 0.46783     | 0.27341  | 0.0930 |
| H00N | 8b | 1 |      | 0.56687     | 0.47596     | 0.06856  | 0.0930 |
| C1   | 8b | 1 |      | 0.6184(10)  | 0.7997(9)   | 0.198(3) |        |
| H1A  | 8b | 1 |      | 0.62406     | 0.79641     | 0.32651  | 0.0570 |
| H1B  | 8b | 1 |      | 0.57868     | 0.82919     | 0.17534  | 0.0570 |
| Cl3  | 8b | 1 | 0.78 | 0.59405(15) | 0.75471(13) | 0.648(2) |        |

| <b>x = 2.12 (90 K)</b> |              |             |               |             |             |            |                          |
|------------------------|--------------|-------------|---------------|-------------|-------------|------------|--------------------------|
| <b>Atom</b>            | <b>Wyck.</b> | <b>Site</b> | <b>S.O.F.</b> | <b>x/a</b>  | <b>y/b</b>  | <b>z/c</b> | <b>U [Å<sup>2</sup>]</b> |
| Bi1                    | 8b           | 1           |               | 0.63127(3)  | 0.63406(3)  | 0.3486(5)  |                          |
| Br5                    | 8b           | 1           | 0.64          | 0.66086(17) | 0.50864(13) | 0.3536(14) |                          |
| Br1                    | 8b           | 1           | 0.46          | 0.5260(4)   | 0.6187(5)   | 0.0972(7)  |                          |
| Br2                    | 8b           | 1           | 0.57          | 0.5280(4)   | 0.6241(3)   | 0.6025(9)  |                          |
| Br3                    | 8b           | 1           | 0.36          | 0.6000(3)   | 0.7558(2)   | 0.348(2)   |                          |
| Br4                    | 8b           | 1           | 0.1           | 0.7327(5)   | 0.6514(5)   | 0.6467(12) |                          |
| Cl4                    | 8b           | 1           | 0.9           | 0.7327(5)   | 0.6514(5)   | 0.6467(12) |                          |
| Cl2                    | 8b           | 1           | 0.43          | 0.5280(4)   | 0.6241(3)   | 0.6025(9)  |                          |
| Cl3                    | 8b           | 1           | 0.64          | 0.6000(3)   | 0.7558(2)   | 0.348(2)   |                          |
| Cl1                    | 8b           | 1           | 0.54          | 0.5260(4)   | 0.6187(5)   | 0.0972(7)  |                          |
| Cl5                    | 8b           | 1           | 0.36          | 0.66086(17) | 0.50864(13) | 0.3536(14) |                          |
| N1                     | 8b           | 1           |               | 0.8516(11)  | 0.5316(10)  | 0.346(6)   |                          |
| H1A                    | 8b           | 1           |               | 0.88234     | 0.56333     | 0.33727    | 0.0770                   |
| H1B                    | 8b           | 1           |               | 0.81781     | 0.53273     | 0.25889    | 0.0770                   |
| H1C                    | 8b           | 1           |               | 0.82779     | 0.53273     | 0.44989    | 0.0770                   |
| C4                     | 8b           | 1           |               | 0.8478(16)  | 0.4216(14)  | 0.347(9)   |                          |
| H4A                    | 8b           | 1           |               | 0.87928     | 0.38631     | 0.33821    | 0.1530                   |
| H4B                    | 8b           | 1           |               | 0.82214     | 0.42140     | 0.45917    | 0.1530                   |
| H4C                    | 8b           | 1           |               | 0.81138     | 0.42139     | 0.25315    | 0.1530                   |
| C6                     | 8b           | 1           |               | 0.895(2)    | 0.4765(15)  | 0.334(10)  |                          |
| H6A                    | 8b           | 1           |               | 0.93222     | 0.47594     | 0.42751    | 0.0990                   |
| H6B                    | 8b           | 1           |               | 0.92146     | 0.47593     | 0.22151    | 0.0990                   |
| C3                     | 8b           | 1           |               | 0.6845(14)  | 0.3241(13)  | 0.364(7)   |                          |
| H3A                    | 8b           | 1           |               | 0.69238     | 0.35747     | 0.28456    | 0.1150                   |
| H3B                    | 8b           | 1           |               | 0.67626     | 0.33930     | 0.48164    | 0.1150                   |
| H3C                    | 8b           | 1           |               | 0.72824     | 0.29837     | 0.36355    | 0.1150                   |
| N2                     | 8b           | 1           |               | 0.592(2)    | 0.2457(16)  | 0.372(7)   |                          |

|     |    |   |  |         |         |         |        |
|-----|----|---|--|---------|---------|---------|--------|
| H2A | 8b | 1 |  | 0.55235 | 0.23547 | 0.30605 | 0.1550 |
|-----|----|---|--|---------|---------|---------|--------|

| <b>x= 5 (90 K)</b> |       |      |        |             |            |            |                     |
|--------------------|-------|------|--------|-------------|------------|------------|---------------------|
| Atom               | Wyck. | Site | S.O.F. | x/a         | y/b        | z/c        | U [Å <sup>2</sup> ] |
| Bi1                | 8b    | 1    |        | 0.37227(2)  | 0.36860(2) | 0.3961(6)  |                     |
| Br1                | 8b    | 1    |        | 0.4713(3)   | 0.3804(3)  | 0.1378(3)  |                     |
| Br2                | 8b    | 1    |        | 0.4696(3)   | 0.3831(4)  | 0.6500(3)  |                     |
| Br3                | 8b    | 1    |        | 0.40102(11) | 0.24489(8) | 0.3905(14) |                     |
| Br4                | 8b    | 1    |        | 0.2499(7)   | 0.3505(1)  | 0.6456(13) |                     |
| Br5                | 8b    | 1    |        | 0.33887(10) | 0.49235(8) | 0.4019(15) |                     |
| N2                 | 8b    | 1    |        | 0.1531(7)   | 0.4683(6)  | 0.401(7)   |                     |
| H2A                | 8b    | 1    |        | 0.12584     | 0.43834    | 0.36235    | 0.1010              |
| H2B                | 8b    | 1    |        | 0.19543     | 0.46927    | 0.34507    | 0.1010              |
| H2C                | 8b    | 1    |        | 0.16169     | 0.46311    | 0.51097    | 0.1010              |
| C3                 | 8b    | 1    |        | 0.1147(12)  | 0.5237(9)  | 0.376(6)   |                     |
| H3A                | 8b    | 1    |        | 0.10443     | 0.52818    | 0.25593    | 0.1600              |
| H3B                | 8b    | 1    |        | 0.06809     | 0.52156    | 0.43457    | 0.1600              |
| C2                 | 8b    | 1    |        | 0.1532(11)  | 0.5756(9)  | 0.433(5)   |                     |
| H2D                | 8b    | 1    |        | 0.12392     | 0.61040    | 0.41182    | 0.1290              |
| H2E                | 8b    | 1    |        | 0.16244     | 0.57230    | 0.55255    | 0.1290              |
| H2F                | 8b    | 1    |        | 0.19884     | 0.57894    | 0.37360    | 0.1290              |
| C1                 | 8b    | 1    |        | 0.3174(13)  | 0.1740(11) | 0.942(3)   |                     |
| H1A                | 8b    | 1    |        | 0.30010     | 0.14033    | 0.87854    | 0.1970              |
| H1B                | 8b    | 1    |        | 0.33861     | 0.16046    | 1.04664    | 0.1970              |
| H1C                | 8b    | 1    |        | 0.27707     | 0.20018    | 0.96619    | 0.1970              |
| C4                 | 8b    | 1    |        | 0.3753(14)  | 0.2075(11) | 0.839(2)   |                     |
| H4A                | 8b    | 1    |        | 0.41570     | 0.18085    | 0.81317    | 0.1610              |
| H4B                | 8b    | 1    |        | 0.35406     | 0.22064    | 0.73259    | 0.1610              |
| N4                 | 8b    | 1    |        | 0.4037(12)  | 0.2610(9)  | 0.937(3)   |                     |
| H4C                | 8b    | 1    |        | 0.43721     | 0.27994    | 0.87485    | 0.1610              |
| H4D                | 8b    | 1    |        | 0.36667     | 0.28568    | 0.95882    | 0.1610              |
| H4E                | 8b    | 1    |        | 0.42372     | 0.24886    | 1.03340    | 0.1610              |

**Table S7:** Anisotropic displacement parameters (in Å<sup>2</sup>) of (C<sub>2</sub>H<sub>5</sub>NH<sub>3</sub>)<sub>2</sub>BiCl<sub>5-x</sub>Br<sub>x</sub>

| <b>x = 0</b> |                 |                 |                 |                 |                 |                 |
|--------------|-----------------|-----------------|-----------------|-----------------|-----------------|-----------------|
| Atom         | U <sub>11</sub> | U <sub>22</sub> | U <sub>33</sub> | U <sub>12</sub> | U <sub>13</sub> | U <sub>23</sub> |
| Bi1          | 0.03825(17)     | 0.0641(2)       | 0.04213(18)     | 0.00000         | 0.00000         | 0.00853(12)     |
| Cl1          | 0.070(1)        | 0.1244(14)      | 0.0737(11)      | -0.0163(10)     | -0.0285(8)      | 0.0033(9)       |
| Cl2          | 0.133(2)        | 0.0561(14)      | 0.0923(17)      | 0.00000         | 0.00000         | 0.0161(13)      |
| Cl3          | 0.193(3)        | 0.0550(14)      | 0.0764(16)      | 0.00000         | 0.00000         | 0.0095(12)      |
| Cl4          | 0.126(3)        | 0.140(3)        | 0.155(3)        | 0.00000         | -0.104(2)       | 0.00000         |
| N2           | 0.116(7)        | 0.063(5)        | 0.083(5)        | 0.00000         | 0.00000         | 0.012(4)        |
| C3           | 0.49(4)         | 0.053(8)        | 0.116(11)       | 0.00000         | 0.00000         | -0.020(7)       |
| C4           | 0.25(2)         | 0.115(12)       | 0.096(9)        | 0.00000         | 0.00000         | 0.029(9)        |

|    |           |           |           |            |            |            |
|----|-----------|-----------|-----------|------------|------------|------------|
| C1 | 0.071(13) | 0.165(14) | 0.138(12) | -0.008(9)  | -0.015(8)  | -0.058(10) |
| C2 | 0.093(14) | 0.172(16) | 0.169(15) | -0.009(10) | -0.011(10) | -0.063(12) |
| N1 | 0.051(11) | 0.147(9)  | 0.138(9)  | 0.003(6)   | 0.005(6)   | -0.063(8)  |

| <b>x = 1.185</b> |                       |                       |                       |                       |                       |                       |
|------------------|-----------------------|-----------------------|-----------------------|-----------------------|-----------------------|-----------------------|
| <b>Atom</b>      | <b>U<sub>11</sub></b> | <b>U<sub>22</sub></b> | <b>U<sub>33</sub></b> | <b>U<sub>12</sub></b> | <b>U<sub>13</sub></b> | <b>U<sub>23</sub></b> |
| Bi1              | 0.03917(19)           | 0.0651(3)             | 0.0402(2)             | 0.00000               | 0.00000               | 0.00869(17)           |
| Cl1              | 0.0709(9)             | 0.1314(15)            | 0.0782(10)            | -0.0167(9)            | -0.0286(7)            | 0.0061(8)             |
| Cl3              | 0.173(2)              | 0.0620(14)            | 0.0797(15)            | 0.00000               | 0.00000               | 0.0145(12)            |
| Cl2              | 0.126(2)              | 0.0637(16)            | 0.0989(17)            | 0.00000               | 0.00000               | 0.0192(13)            |
| Cl4              | 0.109(2)              | 0.145(3)              | 0.130(3)              | 0.00000               | -0.082(2)             | 0.00000               |
| N2               | 0.123(8)              | 0.070(7)              | 0.068(5)              | 0.00000               | 0.00000               | 0.002(5)              |
| C3               | 0.41(3)               | 0.056(10)             | 0.095(11)             | 0.00000               | 0.00000               | -0.007(9)             |
| C4               | 0.25(2)               | 0.096(12)             | 0.098(10)             | 0.00000               | 0.00000               | 0.033(10)             |
| Br4              | 0.109(2)              | 0.145(3)              | 0.130(3)              | 0.00000               | -0.082(2)             | 0.00000               |
| Br2              | 0.126(2)              | 0.0637(16)            | 0.0989(17)            | 0.00000               | 0.00000               | 0.0192(13)            |
| Br1              | 0.0709(9)             | 0.1314(15)            | 0.0782(10)            | -0.0167(9)            | -0.0286(7)            | 0.0061(8)             |
| Br3              | 0.173(2)              | 0.0620(14)            | 0.0797(15)            | 0.00000               | 0.00000               | 0.0145(12)            |
| N1               | 0.050(12)             | 0.157(12)             | 0.162(10)             | 0.021(8)              | 0.001(7)              | -0.063(10)            |
| C2               | 0.079(14)             | 0.177(19)             | 0.190(18)             | 0.011(10)             | -0.016(10)            | -0.050(14)            |
| C1               | 0.087(17)             | 0.155(16)             | 0.139(14)             | -0.03(1)              | -0.025(9)             | -0.048(12)            |

| <b>x = 2.27</b> |                       |                       |                       |                       |                       |                       |
|-----------------|-----------------------|-----------------------|-----------------------|-----------------------|-----------------------|-----------------------|
| <b>Atom</b>     | <b>U<sub>11</sub></b> | <b>U<sub>22</sub></b> | <b>U<sub>33</sub></b> | <b>U<sub>12</sub></b> | <b>U<sub>13</sub></b> | <b>U<sub>23</sub></b> |
| Bi1             | 0.0422(3)             | 0.0633(3)             | 0.0470(3)             | 0.00000               | 0.00000               | -0.0087(2)            |
| Cl1             | 0.0723(9)             | 0.1297(15)            | 0.0810(11)            | 0.0168(9)             | -0.0277(7)            | -0.0057(8)            |
| Cl3             | 0.167(2)              | 0.0576(14)            | 0.0819(15)            | 0.00000               | 0.00000               | -0.0115(11)           |
| Cl2             | 0.126(2)              | 0.0617(16)            | 0.1095(18)            | 0.00000               | 0.00000               | -0.0174(12)           |
| Cl4             | 0.106(2)              | 0.148(3)              | 0.127(3)              | 0.00000               | -0.074(2)             | 0.00000               |
| Br3             | 0.167(2)              | 0.0576(14)            | 0.0819(15)            | 0.00000               | 0.00000               | -0.0115(11)           |
| Br1             | 0.0723(9)             | 0.1297(15)            | 0.0810(11)            | 0.0168(9)             | -0.0277(7)            | -0.0057(8)            |
| Br4             | 0.106(2)              | 0.148(3)              | 0.127(3)              | 0.00000               | -0.074(2)             | 0.00000               |
| Br2             | 0.126(2)              | 0.0617(16)            | 0.1095(18)            | 0.00000               | 0.00000               | -0.0174(12)           |
| N2              | 0.129(10)             | 0.070(8)              | 0.069(7)              | 0.00000               | 0.00000               | 0.000(6)              |
| C4              | 0.231(18)             | 0.096(13)             | 0.092(11)             | 0.00000               | 0.00000               | -0.025(10)            |
| C3              | 0.32(2)               | 0.070(11)             | 0.096(12)             | 0.00000               | 0.00000               | 0.015(10)             |
| C1              | 0.056(16)             | 0.16(2)               | 0.150(18)             | 0.034(12)             | -0.028(10)            | 0.051(13)             |
| C2              | 0.071(16)             | 0.17(2)               | 0.20(2)               | -0.007(13)            | -0.013(12)            | 0.065(15)             |
| N1              | 0.044(14)             | 0.140(14)             | 0.189(14)             | -0.023(9)             | 0.006(9)              | 0.067(11)             |

| <b>x = 3.125</b> |                       |                       |                       |                       |                       |                       |
|------------------|-----------------------|-----------------------|-----------------------|-----------------------|-----------------------|-----------------------|
| <b>Atom</b>      | <b>U<sub>11</sub></b> | <b>U<sub>22</sub></b> | <b>U<sub>33</sub></b> | <b>U<sub>12</sub></b> | <b>U<sub>13</sub></b> | <b>U<sub>23</sub></b> |
| Bi1              | 0.03818(19)           | 0.0588(2)             | 0.04242(19)           | 0.00000               | 0.00000               | -0.00906(16)          |
| Cl1              | 0.0634(7)             | 0.1213(9)             | 0.0709(7)             | 0.0133(6)             | -0.0251(5)            | -0.0054(6)            |
| Cl3              | 0.1641(18)            | 0.0551(9)             | 0.0748(11)            | 0.00000               | 0.00000               | -0.0100(7)            |
| Cl2              | 0.1219(15)            | 0.0552(10)            | 0.1038(13)            | 0.00000               | 0.00000               | -0.0168(8)            |

|     |            |            |            |            |             |            |
|-----|------------|------------|------------|------------|-------------|------------|
| Cl4 | 0.0893(15) | 0.1347(19) | 0.1049(17) | 0.00000    | -0.0617(13) | 0.00000    |
| C1  | 0.29(2)    | 0.058(8)   | 0.096(10)  | 0.00000    | 0.00000     | 0.003(7)   |
| N1  | 0.140(9)   | 0.067(6)   | 0.070(6)   | 0.00000    | 0.00000     | 0.004(5)   |
| C2  | 0.216(16)  | 0.074(9)   | 0.103(10)  | 0.00000    | 0.00000     | 0.022(8)   |
| Br1 | 0.0634(7)  | 0.1213(9)  | 0.0709(7)  | 0.0133(6)  | -0.0251(5)  | -0.0054(6) |
| Br3 | 0.1641(18) | 0.0551(9)  | 0.0748(11) | 0.00000    | 0.00000     | -0.0100(7) |
| Br4 | 0.0893(15) | 0.1347(19) | 0.1049(17) | 0.00000    | -0.0617(13) | 0.00000    |
| Br2 | 0.1219(15) | 0.0552(10) | 0.1038(13) | 0.00000    | 0.00000     | -0.0168(8) |
| N2  | 0.054(14)  | 0.160(13)  | 0.178(14)  | 0.015(8)   | -0.014(9)   | 0.083(11)  |
| C4  | 0.089(16)  | 0.20(2)    | 0.20(2)    | 0.005(13)  | 0.007(12)   | 0.074(14)  |
| C3  | 0.086(19)  | 0.148(15)  | 0.149(16)  | -0.025(11) | 0.017(11)   | 0.060(12)  |

| <b><math>x = 5</math></b> |                            |                            |                            |                            |                            |                            |
|---------------------------|----------------------------|----------------------------|----------------------------|----------------------------|----------------------------|----------------------------|
| <b>Atom</b>               | <b><math>U_{11}</math></b> | <b><math>U_{22}</math></b> | <b><math>U_{33}</math></b> | <b><math>U_{12}</math></b> | <b><math>U_{13}</math></b> | <b><math>U_{23}</math></b> |
| Bi1                       | 0.0301(3)                  | 0.0547(3)                  | 0.0404(3)                  | 0.00000                    | 0.00000                    | 0.0082(3)                  |
| Br1                       | 0.0538(6)                  | 0.1125(9)                  | 0.0655(7)                  | -0.0119(6)                 | -0.0236(6)                 | 0.0033(7)                  |
| Br2                       | 0.1104(14)                 | 0.0498(8)                  | 0.0963(14)                 | 0.00000                    | 0.00000                    | 0.014(1)                   |
| Br3                       | 0.1663(18)                 | 0.0495(9)                  | 0.0729(12)                 | 0.00000                    | 0.00000                    | 0.0079(9)                  |
| Br4                       | 0.0678(11)                 | 0.1190(13)                 | 0.0883(13)                 | 0.00000                    | -0.045(1)                  | 0.00000                    |
| N1                        | 0.107(11)                  | 0.060(8)                   | 0.08(1)                    | 0.00000                    | 0.00000                    | 0.010(8)                   |
| C2                        | 0.19(2)                    | 0.085(13)                  | 0.114(18)                  | 0.00000                    | 0.00000                    | 0.052(15)                  |
| C1                        | 0.30(3)                    | 0.043(10)                  | 0.097(16)                  | 0.00000                    | 0.00000                    | 0.002(12)                  |
| N2                        | 0.036(17)                  | 0.165(18)                  | 0.178(19)                  | 0.017(10)                  | 0.021(12)                  | -0.054(15)                 |
| C4                        | 0.056(17)                  | 0.20(2)                    | 0.18(2)                    | 0.008(14)                  | -0.013(15)                 | -0.037(19)                 |
| C3                        | 0.07(2)                    | 0.18(2)                    | 0.13(2)                    | -0.030(16)                 | -0.027(14)                 | -0.059(18)                 |

| <b><math>x = 0</math> (160 K)</b> |                            |                            |                            |                            |                            |                            |
|-----------------------------------|----------------------------|----------------------------|----------------------------|----------------------------|----------------------------|----------------------------|
| <b>Atom</b>                       | <b><math>U_{11}</math></b> | <b><math>U_{22}</math></b> | <b><math>U_{33}</math></b> | <b><math>U_{12}</math></b> | <b><math>U_{13}</math></b> | <b><math>U_{23}</math></b> |
| Bi1                               | 0.0247(4)                  | 0.0196(3)                  | 0.0206(4)                  | 0.00000(11)                | 0.00134(12)                | -0.00087(11)               |
| Cl1                               | 0.0343(13)                 | 0.0310(12)                 | 0.0419(13)                 | 0.0093(10)                 | -0.0032(10)                | 0.0043(11)                 |
| Cl2                               | 0.0376(12)                 | 0.0284(11)                 | 0.0348(13)                 | -0.0067(10)                | -0.0023(10)                | -0.0078(10)                |
| Cl3                               | 0.0409(14)                 | 0.0382(12)                 | 0.0187(11)                 | -0.0026(12)                | 0.0036(10)                 | -0.0002(11)                |
| Cl4                               | 0.0432(13)                 | 0.0384(13)                 | 0.0493(17)                 | -0.0163(11)                | 0.0032(13)                 | -0.0048(12)                |
| Cl5                               | 0.0398(15)                 | 0.0553(17)                 | 0.0214(14)                 | 0.0052(10)                 | 0.0051(11)                 | -0.003(1)                  |
| N2                                | 0.041(5)                   | 0.048(5)                   | 0.021(5)                   | -0.006(4)                  | -0.001(4)                  | 0.006(4)                   |
| N1                                | 0.038(6)                   | 0.031(5)                   | 0.023(5)                   | -0.002(3)                  | -0.001(4)                  | 0.000(3)                   |
| C4                                | 0.063(9)                   | 0.066(9)                   | 0.032(8)                   | -0.010(6)                  | 0.027(7)                   | 0.004(5)                   |
| C2                                | 0.051(6)                   | 0.035(5)                   | 0.031(6)                   | -0.003(6)                  | -0.002(5)                  | 0.004(5)                   |
| C3                                | 0.050(8)                   | 0.156(18)                  | 0.029(8)                   | -0.010(8)                  | 0.004(7)                   | 0.005(7)                   |
| C1                                | 0.074(11)                  | 0.066(9)                   | 0.056(10)                  | -0.010(6)                  | -0.027(9)                  | -0.001(6)                  |

| <b><math>x = 0</math> (90 K)</b> |                            |                            |                            |                            |                            |                            |
|----------------------------------|----------------------------|----------------------------|----------------------------|----------------------------|----------------------------|----------------------------|
| <b>Atom</b>                      | <b><math>U_{11}</math></b> | <b><math>U_{22}</math></b> | <b><math>U_{33}</math></b> | <b><math>U_{12}</math></b> | <b><math>U_{13}</math></b> | <b><math>U_{23}</math></b> |
| Bi1                              | 0.00948(16)                | 0.02451(18)                | 0.01186(17)                | 0.00082(13)                | 0.0004(3)                  | -0.0058(3)                 |
| Cl1                              | 0.0141(13)                 | 0.0356(18)                 | 0.0161(13)                 | 0.0022(12)                 | 0.0026(11)                 | -<br>0.0025(14)            |
| Cl2                              | 0.0227(15)                 | 0.069(2)                   | 0.0105(13)                 | -0.0179(17)                | -<br>0.0016(12)            | -<br>0.0094(16)            |
| Cl3                              | 0.0172(11)                 | 0.0307(13)                 | 0.0166(15)                 | 0.0055(10)                 | -0.0018(9)                 | -<br>0.0003(10)            |
| Cl4                              | 0.0223(14)                 | 0.0380(15)                 | 0.0183(14)                 | -0.0023(12)                | -0.012(1)                  | -<br>0.0018(13)            |
| Cl5                              | 0.0227(12)                 | 0.0224(12)                 | 0.076(3)                   | 0.0006(10)                 | 0.0179(18)                 | -<br>0.0143(18)            |
| N1                               | 0.021(4)                   | 0.051(5)                   | 0.015(5)                   | -0.016(4)                  | 0.004(5)                   | -0.001(6)                  |
| C2                               | 0.027(5)                   | 0.041(6)                   | 0.032(8)                   | -0.005(5)                  | 0.001(7)                   | -0.002(7)                  |
| C1                               | 0.028(6)                   | 0.037(7)                   | 0.025(6)                   | 0.009(5)                   | 0.001(5)                   | -0.003(5)                  |
| C4                               | 0.035(8)                   | 0.063(10)                  | 0.24(3)                    | -0.016(7)                  | 0.029(13)                  | 0.017(15)                  |
| C3                               | 0.095(11)                  | 0.085(10)                  | 0.15(2)                    | -0.074(9)                  | -0.050(15)                 | 0.068(15)                  |
| N2                               | 0.018(4)                   | 0.030(5)                   | 0.035(7)                   | -0.005(3)                  | -0.006(4)                  | 0.007(4)                   |

| <b><math>x = 1.15</math> (90 K)</b> |                            |                            |                            |                            |                            |                            |
|-------------------------------------|----------------------------|----------------------------|----------------------------|----------------------------|----------------------------|----------------------------|
| <b>Atom</b>                         | <b><math>U_{11}</math></b> | <b><math>U_{22}</math></b> | <b><math>U_{33}</math></b> | <b><math>U_{12}</math></b> | <b><math>U_{13}</math></b> | <b><math>U_{23}</math></b> |
| Bi1                                 | 0.01496(19)                | 0.0259(2)                  | 0.0192(2)                  | 0.00160(17)                | 0.0001(6)                  | 0.0017(7)                  |
| Br5                                 | 0.0315(14)                 | 0.0301(14)                 | 0.095(3)                   | 0.0085(10)                 | -0.027(3)                  | -0.006(3)                  |
| Br3                                 | 0.0282(15)                 | 0.0311(16)                 | 0.140(4)                   | 0.0063(11)                 | 0.011(5)                   | 0.002(6)                   |
| Br2                                 | 0.078(4)                   | 0.046(4)                   | 0.079(6)                   | 0.002(3)                   | -0.058(4)                  | -0.001(3)                  |
| Br4                                 | 0.031(2)                   | 0.051(3)                   | 0.030(2)                   | -0.0018(17)                | 0.0174(14)                 | -0.0030(19)                |
| N008                                | 0.043(7)                   | 0.059(9)                   | 0.054(11)                  | -0.016(6)                  | -0.009(15)                 | -0.020(18)                 |
| N009                                | 0.021(6)                   | 0.040(7)                   | 0.084(19)                  | 0.000(5)                   | -0.004(11)                 | -0.024(13)                 |
| C00A                                | 0.041(8)                   | 0.044(9)                   | 0.081(19)                  | -0.015(7)                  | 0.025(17)                  | -0.016(18)                 |
| C00B                                | 0.028(9)                   | 0.062(14)                  | 0.19(3)                    | -0.016(9)                  | 0.01(3)                    | -0.07(3)                   |
| C00C                                | 0.062(12)                  | 0.051(12)                  | 0.12(3)                    | -0.039(10)                 | 0.02(3)                    | -0.03(3)                   |
| C1                                  | 0.037(10)                  | 0.057(13)                  | 0.048(14)                  | 0.007(9)                   | -0.003(7)                  | 0.001(9)                   |
| Cl3                                 | 0.0282(15)                 | 0.0311(16)                 | 0.140(4)                   | 0.0063(11)                 | 0.011(5)                   | 0.002(6)                   |
| Cl4                                 | 0.031(2)                   | 0.051(3)                   | 0.030(2)                   | -0.0018(17)                | 0.0174(14)                 | -0.0030(19)                |
| Cl5                                 | 0.0315(14)                 | 0.0301(14)                 | 0.095(3)                   | 0.0085(10)                 | -0.027(3)                  | -0.006(3)                  |
| Cl1                                 | 0.104(5)                   | 0.079(6)                   | 0.053(5)                   | -0.044(5)                  | 0.049(4)                   | -0.016(3)                  |
| Cl2                                 | 0.078(4)                   | 0.046(4)                   | 0.079(6)                   | 0.002(3)                   | -0.058(4)                  | -0.001(3)                  |
| Br1                                 | 0.104(5)                   | 0.079(6)                   | 0.053(5)                   | -0.044(5)                  | 0.049(4)                   | -0.016(3)                  |

| <b><math>x = 2.12</math> (90 K)</b> |                            |                            |                            |                            |                            |                            |
|-------------------------------------|----------------------------|----------------------------|----------------------------|----------------------------|----------------------------|----------------------------|
| <b>Atom</b>                         | <b><math>U_{11}</math></b> | <b><math>U_{22}</math></b> | <b><math>U_{33}</math></b> | <b><math>U_{12}</math></b> | <b><math>U_{13}</math></b> | <b><math>U_{23}</math></b> |
| Bi1                                 | 0.0309(5)                  | 0.0413(6)                  | 0.0527(6)                  | 0.0040(2)                  | 0.0005(8)                  | 0.0005(10)                 |
| Br5                                 | 0.0473(18)                 | 0.0364(19)                 | 0.137(4)                   | 0.0083(12)                 | 0.018(4)                   | -0.002(5)                  |
| Br1                                 | 0.104(5)                   | 0.101(6)                   | 0.047(3)                   | -0.031(5)                  | -0.029(4)                  | 0.006(3)                   |
| Br2                                 | 0.067(4)                   | 0.074(5)                   | 0.092(5)                   | 0.008(3)                   | 0.034(4)                   | 0.006(3)                   |
| Br3                                 | 0.069(3)                   | 0.038(3)                   | 0.157(6)                   | 0.0103(19)                 | -0.023(7)                  | -0.002(7)                  |

|     |            |            |           |            |           |           |
|-----|------------|------------|-----------|------------|-----------|-----------|
| Br4 | 0.071(6)   | 0.112(7)   | 0.087(7)  | -0.026(5)  | -0.044(4) | 0.028(5)  |
| C14 | 0.071(6)   | 0.112(7)   | 0.087(7)  | -0.026(5)  | -0.044(4) | 0.028(5)  |
| C12 | 0.067(4)   | 0.074(5)   | 0.092(5)  | 0.008(3)   | 0.034(4)  | 0.006(3)  |
| C13 | 0.069(3)   | 0.038(3)   | 0.157(6)  | 0.0103(19) | -0.023(7) | -0.002(7) |
| C11 | 0.104(5)   | 0.101(6)   | 0.047(3)  | -0.031(5)  | -0.029(4) | 0.006(3)  |
| C15 | 0.0473(18) | 0.0364(19) | 0.137(4)  | 0.0083(12) | 0.018(4)  | -0.002(5) |
| N1  | 0.044(9)   | 0.056(14)  | 0.092(17) | 0.005(9)   | -0.01(2)  | -0.03(2)  |
| C4  | 0.064(16)  | 0.056(19)  | 0.19(4)   | 0.021(15)  | 0.06(3)   | 0.03(4)   |
| C6  | 0.073(17)  | 0.055(18)  | 0.12(3)   | 0.009(15)  | -0.02(3)  | 0.01(3)   |
| C3  | 0.059(14)  | 0.07(2)    | 0.10(2)   | -0.011(13) | 0.02(3)   | -0.03(3)  |
| N2  | 0.11(2)    | 0.13(3)    | 0.14(3)   | -0.09(2)   | 0.06(3)   | -0.05(3)  |
| C1  | 0.20(6)    | 0.33(10)   | 0.18(9)   | -0.22(7)   | 0.09(6)   | -0.06(7)  |

| <i>x</i> = 5 (90 K) |                        |                        |                        |                        |                        |                        |
|---------------------|------------------------|------------------------|------------------------|------------------------|------------------------|------------------------|
| <i>Atom</i>         | <i>U</i> <sub>11</sub> | <i>U</i> <sub>22</sub> | <i>U</i> <sub>33</sub> | <i>U</i> <sub>12</sub> | <i>U</i> <sub>13</sub> | <i>U</i> <sub>23</sub> |
| Bi1                 | 0.0348(3)              | 0.0586(4)              | 0.0337(3)              | 0.0074(2)              | -0.0009(11)            | 0.0048(11)             |
| Br1                 | 0.063(4)               | 0.101(3)               | 0.054(4)               | 0.004(3)               | 0.022(3)               | 0.005(3)               |
| Br2                 | 0.053(3)               | 0.135(4)               | 0.063(4)               | 0.002(4)               | -0.025(3)              | -0.022(4)              |
| Br3                 | 0.0901(12)             | 0.0523(10)             | 0.1140(18)             | 0.0142(8)              | 0.017(5)               | 0.000(5)               |
| Br4                 | 0.0829(11)             | 0.1255(16)             | 0.0709(11)             | -0.006(6)              | 0.0453(10)             | 0.003(7)               |
| Br5                 | 0.0671(10)             | 0.0531(10)             | 0.169(3)               | 0.0078(8)              | -0.020(4)              | 0.017(4)               |
| N2                  | 0.061(8)               | 0.071(10)              | 0.121(14)              | 0.002(7)               | 0.01(3)                | 0.02(4)                |
| C3                  | 0.108(17)              | 0.066(13)              | 0.22(4)                | 0.025(13)              | -0.13(3)               | -0.03(3)               |
| C2                  | 0.090(13)              | 0.068(13)              | 0.10(4)                | 0.015(11)              | 0.039(18)              | 0.003(15)              |
| C1                  | 0.14(2)                | 0.15(2)                | 0.11(3)                | -0.049(16)             | -0.007(16)             | -0.047(18)             |
| C4                  | 0.19(2)                | 0.12(2)                | 0.09(2)                | -0.015(16)             | 0.002(16)              | -0.020(15)             |
| N4                  | 0.192(19)              | 0.120(17)              | 0.09(3)                | -0.073(15)             | -0.006(16)             | 0.034(15)              |

**Table S8:** Selected bond lengths obtained from Single Crystals of (C<sub>2</sub>H<sub>5</sub>NH<sub>3</sub>)<sub>2</sub>BiCl<sub>5-x</sub>Br<sub>x</sub>

| <i>x</i> = 0          |                  |           |                  |
|-----------------------|------------------|-----------|------------------|
| Atoms 1,2             | <i>d</i> 1,2 [Å] | Atoms 1,2 | <i>d</i> 1,2 [Å] |
| Bi1—Cl1 <sup>i</sup>  | 2.5773(16)       | C3—C4     | 1.294(18)        |
| Bi1—Cl1               | 2.5773(16)       | C4—H4A    | 0.9700           |
| Bi1—Cl2               | 2.678(2)         | C4—H4B    | 0.9700           |
| Bi1—Cl3               | 2.695(2)         | C1—H1A    | 0.9600           |
| Bi1—Cl4 <sup>ii</sup> | 2.8384(6)        | C1—H1B    | 0.9600           |
| Bi1—Cl4               | 2.8384(6)        | C1—H1C    | 0.9600           |
| N2—H2A                | 0.8900           | C1—C2     | 1.5320           |
| N2—H2B                | 0.8900           | C2—H2D    | 0.9700           |
| N2—H2C                | 0.8900           | C2—H2E    | 0.9700           |
| N2—C4                 | 1.477(15)        | C2—N1     | 1.5191           |
| C3—H3A                | 0.9600           | N1—H1D    | 0.8900           |
| C3—H3B                | 0.9600           | N1—H1E    | 0.8900           |

C3—H3C

0.9600

N1—H1F

0.8900

| <i>x</i> = 1.185          |            |           |           |
|---------------------------|------------|-----------|-----------|
| Atoms 1,2                 | d 1,2 [Å]  | Atoms 1,2 | d 1,2 [Å] |
| Bi1—C11 Br1 <sup>i</sup>  | 2.6358(12) | C3—H3B    | 0.9600    |
| Bi1—C11 Br1               | 2.6358(12) | C3—H3C    | 0.9600    |
| Bi1—C13 Br3               | 2.767(2)   | C3—C4     | 1.338(18) |
| Bi1—C12 Br2               | 2.723(2)   | C4—H4A    | 0.9700    |
| Bi1—C14 Br4 <sup>ii</sup> | 2.8596(5)  | C4—H4B    | 0.9700    |
| Bi1—C14 Br4               | 2.8596(5)  | N1—H1A    | 0.8900    |
| Bi1—C14 Br4               | 2.8596(5)  | N1—H1B    | 0.8900    |
| Bi1—C12 Br2               | 2.723(2)   | N1—H1C    | 0.8900    |
| Bi1—C11 Br1               | 2.6358(12) | N1—C2     | 1.5320    |
| Bi1—C13 Br3               | 2.767(2)   | C2—H2D    | 0.9700    |
| N2—H2A                    | 0.8900     | C2—H2E    | 0.9700    |
| N2—H2B                    | 0.8900     | C2—C1     | 1.5189    |
| N2—H2C                    | 0.8900     | C1—H1D    | 0.9600    |
| N2—C4                     | 1.447(15)  | C1—H1E    | 0.9600    |
| C3—H3A                    | 0.9600     | C1—H1F    | 0.9600    |

| <i>x</i> = 2.27           |            |           |           |
|---------------------------|------------|-----------|-----------|
| Atoms 1,2                 | d 1,2 [Å]  | Atoms 1,2 | d 1,2 [Å] |
| Bi1—C11 Br1               | 2.6680(13) | C4—H4B    | 0.9700    |
| Bi1—C11 Br1 <sup>i</sup>  | 2.6680(13) | C4—C3     | 1.36(2)   |
| Bi1—Br3 Cl3               | 2.7925(19) | C3—H3A    | 0.9600    |
| Bi1—C12 Br2               | 2.757(2)   | C3—H3B    | 0.9600    |
| Bi1—C14 Br4               | 2.8842(5)  | C3—H3C    | 0.9600    |
| Bi1—C14 Br4 <sup>ii</sup> | 2.8841(5)  | C1—H1A    | 0.9600    |
| Bi1—Br3 Cl3               | 2.7925(19) | C1—H1B    | 0.9600    |
| Bi1—C11 Br1               | 2.6680(13) | C1—H1C    | 0.9600    |
| Bi1—C14 Br4               | 2.8842(5)  | C1—C2     | 1.5315    |
| Bi1—C12 Br2               | 2.757(2)   | C2—H2D    | 0.9700    |
| N2—H2A                    | 0.8900     | C2—H2E    | 0.9700    |
| N2—H2B                    | 0.8900     | C2—N1     | 1.5193    |
| N2—H2C                    | 0.8900     | N1—H1D    | 0.8900    |
| N2—C4                     | 1.440(17)  | N1—H1E    | 0.8900    |
| C4—H4A                    | 0.9700     | N1—H1F    | 0.8900    |

| <i>x</i> = 3.125          |            |           |           |
|---------------------------|------------|-----------|-----------|
| Atoms 1,2                 | d 1,2 [Å]  | Atoms 1,2 | d 1,2 [Å] |
| Bi1—Br1 Cl1 <sup>i</sup>  | 2.693(1)   | N1—H1E    | 0.8900    |
| Bi1—Br1 Cl1               | 2.693(1)   | N1—H1F    | 0.8900    |
| Bi1—Br3 Cl3               | 2.8120(14) | N1—C2     | 1.425(14) |
| Bi1—Br2 Cl2               | 2.7846(14) | C2—H2A    | 0.9700    |
| Bi1—C14 Br4 <sup>ii</sup> | 2.9200(4)  | C2—H2B    | 0.9700    |
| Bi1—C14 Br4               | 2.9200(4)  | N2—H2C    | 0.8900    |
| Bi1—Br1 Cl1               | 2.693(1)   | N2—H2D    | 0.8900    |

|             |            |        |        |
|-------------|------------|--------|--------|
| Bi1—Br3 Cl3 | 2.8120(14) | N2—H2E | 0.8900 |
| Bi1—Cl4 Br4 | 2.9200(4)  | N2—C4  | 1.5317 |
| Bi1—Br2 Cl2 | 2.7846(14) | C4—H4A | 0.9700 |
| C1—H1A      | 0.9600     | C4—H4B | 0.9700 |
| C1—H1B      | 0.9600     | C4—C3  | 1.5198 |
| C1—H1C      | 0.9600     | C3—H3A | 0.9600 |
| C1—C2       | 1.363(17)  | C3—H3B | 0.9600 |
| N1—H1D      | 0.8900     | C3—H3C | 0.9600 |

| <i>x</i> = 5          |            |           |           |
|-----------------------|------------|-----------|-----------|
| Atoms 1,2             | d 1,2 [Å]  | Atoms 1,2 | d 1,2 [Å] |
| Bi1—Br1               | 2.7159(10) | C1—H1D    | 0.9600    |
| Bi1—Br1 <sup>i</sup>  | 2.716(1)   | C1—H1E    | 0.9600    |
| Bi1—Br2               | 2.8224(15) | C1—H1F    | 0.9600    |
| Bi1—Br3               | 2.8377(15) | N2—H2C    | 0.8900    |
| Bi1—Br4               | 3.0045(5)  | N2—H2D    | 0.8900    |
| Bi1—Br4 <sup>ii</sup> | 3.0045(5)  | N2—H2E    | 0.8900    |
| N1—H1A                | 0.8900     | N2—C4     | 1.5320    |
| N1—H1B                | 0.8900     | C4—H4A    | 0.9700    |
| N1—H1C                | 0.8900     | C4—H4B    | 0.9700    |
| N1—C2                 | 1.445(18)  | C4—C3     | 1.5189    |
| C2—H2A                | 0.9700     | C3—H3A    | 0.9600    |
| C2—H2B                | 0.9700     | C3—H3B    | 0.9600    |
| C2—C1                 | 1.38(2)    | C3—H3C    | 0.9600    |

| <i>x</i> = 0 (160 K) |           |           |           |
|----------------------|-----------|-----------|-----------|
| Atoms 1,2            | d 1,2 [Å] | Atoms 1,2 | d 1,2 [Å] |
| Bi1—Cl1              | 2.548(2)  | N1—C2     | 1.477(14) |
| Bi1—Cl2              | 2.594(2)  | C4—H4A    | 0.9700    |
| Bi1—Cl3              | 2.688(3)  | C4—H4B    | 0.9700    |
| Bi1—Cl4              | 2.839(2)  | C4—C3     | 1.52(2)   |
| Bi1—Cl4 <sup>i</sup> | 2.928(2)  | C2—H2D    | 0.9700    |
| Bi1—Cl5              | 2.715(3)  | C2—H2E    | 0.9700    |
| N2—H2A               | 0.8900    | C2—C1     | 1.509(19) |
| N2—H2B               | 0.8900    | C3—H3A    | 0.9600    |
| N2—H2C               | 0.8900    | C3—H3B    | 0.9600    |
| N2—C4                | 1.491(16) | C3—H3C    | 0.9600    |
| N1—H1A               | 0.8900    | C1—H1D    | 0.9600    |
| N1—H1B               | 0.8900    | C1—H1E    | 0.9600    |
| N1—H1C               | 0.8900    | C1—H1F    | 0.9600    |

| <i>x</i> = 0 (90 K) |           |           |           |
|---------------------|-----------|-----------|-----------|
| Atoms 1,2           | d 1,2 [Å] | Atoms 1,2 | d 1,2 [Å] |
| Bi1—Cl1             | 2.538(3)  | C1—H1E    | 0.9700    |
| Bi1—Cl2             | 2.593(3)  | C4—H4A    | 0.9600    |
| Bi1—Cl3             | 2.685(3)  | C4—H4B    | 0.9600    |



|                      |           |                        |            |
|----------------------|-----------|------------------------|------------|
| Bi1—Cl4              | 2.842(3)  | C4—H4C                 | 0.9600     |
| Bi1—Cl4 <sup>i</sup> | 2.931(3)  | C4—C3                  | 1.5320     |
| Bi1—Cl5              | 2.715(3)  | C3—H3A                 | 0.9700     |
| N1—H1A               | 0.8900    | C3—H3B                 | 0.9700     |
| N1—H1B               | 0.8900    | C3—N2                  | 1.5194     |
| N1—H1C               | 0.8900    | N2—H2D                 | 0.8900     |
| N1—C1                | 1.465(13) | N2—H2E                 | 0.8900     |
| C2—H2A               | 0.9600    | N2—H2F                 | 0.8900     |
| C2—H2B               | 0.9600    | C15—H2D <sup>ii</sup>  | 3.8464(27) |
| C2—H2C               | 0.9600    | C15—H2D <sup>iii</sup> | 3.3489(42) |
| C2—C1                | 1.534(15) | C15—H2E <sup>iii</sup> | 3.8253(45) |
| C1—H1D               | 0.9700    | C15—H2F <sup>iii</sup> | 2.4356(45) |

| <i>x</i> = 1.15 (90 K)   |           |                            |            |
|--------------------------|-----------|----------------------------|------------|
| Atoms 1,2                | d 1,2 [Å] | Atoms 1,2                  | d 1,2 [Å]  |
| Bi1—Cl5 Br5              | 2.788(2)  | N009—H00I                  | 0.8900     |
| Bi1—Cl3 Br3              | 2.712(3)  | N009—C00C                  | 1.41(2)    |
| Bi1—Cl2 Br2              | 2.609(6)  | C00A—H00D                  | 0.9600     |
| Bi1—Cl4 Br4              | 2.863(4)  | C00A—H00E                  | 0.9600     |
| Bi1—Cl4 Br4 <sup>i</sup> | 2.931(4)  | C00A—H00F                  | 0.9600     |
| Bi1—Cl3 Br3              | 2.712(3)  | C00A—C1                    | 1.45(3)    |
| Bi1—Cl4 Br4              | 2.863(4)  | C00B—H00J                  | 0.9600     |
| Bi1—Cl5 Br5              | 2.788(2)  | C00B—H00K                  | 0.9600     |
| Bi1—Cl1 Br1              | 2.606(6)  | C00B—H00L                  | 0.9600     |
| Bi1—Cl2 Br2              | 2.609(6)  | C00B—C00C                  | 1.38(3)    |
| Bi1—Cl1 Br1              | 2.606(6)  | C00C—H00M                  | 0.9700     |
| N008—H00A                | 0.8900    | C00C—H00N                  | 0.9700     |
| N008—H00B                | 0.8900    | C1—H1A                     | 0.9700     |
| N008—H00C                | 0.8900    | C1—H1B                     | 0.9700     |
| N008—C1                  | 1.43(2)   | H00I—Cl5 Br5 <sup>ii</sup> | 3.2709(89) |
| N009—H00G                | 0.8900    | H00G—Cl5 Br5 <sup>ii</sup> | 4.3851(86) |
| N009—H00H                | 0.8900    | H00H—Cl5 Br5 <sup>ii</sup> | 4.6859(90) |

| <i>x</i> = 2.12 (90 K) |           |           |           |
|------------------------|-----------|-----------|-----------|
| Atoms 1,2              | d 1,2 [Å] | Atoms 1,2 | d 1,2 [Å] |
| Bi1—Br5 Cl5            | 2.815(3)  | C4—H4C    | 0.9600    |
| Bi1—Cl1 Br1            | 2.682(6)  | C4—C6     | 1.47(5)   |
| Bi1—Br2 Cl2            | 2.659(7)  | C6—H6A    | 0.9700    |
| Bi1—Cl3 Br3            | 2.742(4)  | C6—H6B    | 0.9700    |

|                          |          |             |            |
|--------------------------|----------|-------------|------------|
| Bi1—Cl4 Br4              | 2.905(9) | C3—H3A      | 0.9600     |
| Bi1—Cl4 Br4 <sup>i</sup> | 2.877(8) | C3—H3B      | 0.9600     |
| Bi1—Cl4 Br4              | 2.905(9) | C3—H3C      | 0.9600     |
| Bi1—Br2 Cl2              | 2.659(7) | C3—C1       | 1.39(6)    |
| Bi1—Cl3 Br3              | 2.742(4) | N2—H2A      | 0.8900     |
| Bi1—Cl1 Br1              | 2.682(6) | N2—H2B      | 0.8900     |
| Bi1—Br5 Cl5              | 2.815(3) | N2—H2C      | 0.8900     |
| N1—H1A                   | 0.8900   | N2—C1       | 1.22(8)    |
| N1—H1B                   | 0.8900   | C1—H1D      | 0.9700     |
| N1—H1C                   | 0.8900   | C1—H1E      | 0.9700     |
| N1—C6                    | 1.44(4)  | Br5 Cl5—H1C | 3.0907(38) |
| C4—H4A                   | 0.9600   | Br5 Cl5—H1A | 4.1058(30) |
| C4—H4B                   | 0.9600   | Br5 Cl5—H1B | 2.9191(39) |

| <b>x = 5 (90 K)</b>  |                  |                  |                  |
|----------------------|------------------|------------------|------------------|
| <b>Atoms 1,2</b>     | <b>d 1,2 [Å]</b> | <b>Atoms 1,2</b> | <b>d 1,2 [Å]</b> |
| Bi1—Br1              | 2.736(5)         | C2—H2D           | 0.9600           |
| Bi1—Br2              | 2.698(5)         | C2—H2E           | 0.9600           |
| Bi1—Br3              | 2.8247(17)       | C2—H2F           | 0.9600           |
| Bi1—Br4              | 3.005(9)         | C1—H1A           | 0.9600           |
| Bi1—Br4 <sup>i</sup> | 3.006(9)         | C1—H1B           | 0.9600           |
| Bi1—Br5              | 2.8425(18)       | C1—H1C           | 0.9600           |
| N2—H2A               | 0.8900           | C1—C4            | 1.5318           |
| N2—H2B               | 0.8900           | C4—H4A           | 0.9700           |
| N2—H2C               | 0.8900           | C4—H4B           | 0.9700           |
| N2—C3                | 1.44(2)          | C4—N4            | 1.5188           |
| C3—H3A               | 0.9700           | N4—H4C           | 0.8900           |
| C3—H3B               | 0.9700           | N4—H4D           | 0.8900           |
| C3—C2                | 1.43(3)          | N4—H4E           | 0.8900           |

**Table S9:** Selected bond angles obtained from Single Crystals of (C<sub>2</sub>H<sub>5</sub>NH<sub>3</sub>)<sub>2</sub>BiCl<sub>5-x</sub>Br<sub>x</sub>

| <b>x = 0</b>                            |                        |                    |                        |
|-----------------------------------------|------------------------|--------------------|------------------------|
| <b>Atoms 1,2,3</b>                      | <b>Angle 1,2,3 [°]</b> | <b>Atoms 1,2,3</b> | <b>Angle 1,2,3 [°]</b> |
| Cl1 <sup>i</sup> —Bi1—Cl1               | 95.16(9)               | C4—C3—H3B          | 109.500                |
| Cl1—Bi1—Cl2                             | 88.07(5)               | C4—C3—H3C          | 109.500                |
| Cl1 <sup>i</sup> —Bi1—Cl2               | 88.07(6)               | N2—C4—H4A          | 106.500                |
| Cl1—Bi1—Cl3                             | 91.60(5)               | N2—C4—H4B          | 106.500                |
| Cl1 <sup>i</sup> —Bi1—Cl3               | 91.60(5)               | C3—C4—N2           | 123.2(12)              |
| Cl1—Bi1—Cl4 <sup>ii</sup>               | 90.65(4)               | C3—C4—H4A          | 106.500                |
| Cl1—Bi1—Cl4                             | 174.19(5)              | C3—C4—H4B          | 106.500                |
| Cl1 <sup>i</sup> —Bi1—Cl4               | 90.64(4)               | H4A—C4—H4B         | 106.500                |
| Cl1 <sup>i</sup> —Bi1—Cl4 <sup>ii</sup> | 174.18(5)              | H1A—C1—H1B         | 109.500                |
| Cl2—Bi1—Cl3                             | 179.50(8)              | H1A—C1—H1C         | 109.500                |
| Cl2—Bi1—Cl4 <sup>ii</sup>               | 91.74(8)               | H1B—C1—H1C         | 109.500                |
| Cl2—Bi1—Cl4                             | 91.74(8)               | C2—C1—H1A          | 109.500                |
| Cl3—Bi1—Cl4 <sup>ii</sup>               | 88.63(8)               | C2—C1—H1B          | 109.500                |

|                            |            |            |         |
|----------------------------|------------|------------|---------|
| C13—Bi1—C14                | 88.63(8)   | C2—C1—H1C  | 109.500 |
| C14 <sup>ii</sup> —Bi1—C14 | 83.55(2)   | C1—C2—H2D  | 109.500 |
| Bi1—C14—Bi1 <sup>iii</sup> | 162.72(14) | C1—C2—H2E  | 109.500 |
| H2A—N2—H2B                 | 109.500    | H2D—C2—H2E | 108.100 |
| H2A—N2—H2C                 | 109.500    | N1—C2—C1   | 110.600 |
| H2B—N2—H2C                 | 109.500    | N1—C2—H2D  | 109.500 |
| C4—N2—H2A                  | 109.500    | N1—C2—H2E  | 109.500 |
| C4—N2—H2B                  | 109.500    | C2—N1—H1D  | 109.500 |
| C4—N2—H2C                  | 109.500    | C2—N1—H1E  | 109.500 |
| H3A—C3—H3B                 | 109.500    | C2—N1—H1F  | 109.500 |
| H3A—C3—H3C                 | 109.500    | H1D—N1—H1E | 109.500 |
| H3B—C3—H3C                 | 109.500    | H1D—N1—H1F | 109.500 |
| C4—C3—H3A                  | 109.500    | H1E—N1—H1F | 109.500 |

(i) 1-x, y, z; (ii) 0.5+x, y, 0.5-z; (iii) -0.5+x, y, 0.5-z.

| <b>x = 1.185</b>                  |                            |                                 |                            |
|-----------------------------------|----------------------------|---------------------------------|----------------------------|
| <b>Atoms 1,2,3</b>                | <b>Angle<br/>1,2,3 [°]</b> | <b>Atoms 1,2,3</b>              | <b>Angle<br/>1,2,3 [°]</b> |
| C11 Br1 <sup>i</sup> —Bi1—C11 Br1 | 93.89(7)                   | Bi1 <sup>iii</sup> —C14 Br4—Bi1 | 164.60(13)                 |
| Bi1 <sup>iii</sup> —C14 Br4—Bi1   | 164.60(13)                 | H1A—N1—H1B                      | 109.500                    |
| H2A—N2—H2B                        | 109.500                    | H1A—N1—H1C                      | 109.500                    |
| H2A—N2—H2C                        | 109.500                    | H1B—N1—H1C                      | 109.500                    |
| H2B—N2—H2C                        | 109.500                    | C2—N1—H1A                       | 109.500                    |
| C4—N2—H2A                         | 109.500                    | C2—N1—H1B                       | 109.500                    |
| C4—N2—H2B                         | 109.500                    | C2—N1—H1C                       | 109.500                    |
| C4—N2—H2C                         | 109.500                    | N1—C2—H2D                       | 109.500                    |
| H3A—C3—H3B                        | 109.500                    | N1—C2—H2E                       | 109.500                    |
| H3A—C3—H3C                        | 109.500                    | H2D—C2—H2E                      | 108.100                    |
| H3B—C3—H3C                        | 109.500                    | C1—C2—N1                        | 110.600                    |
| C4—C3—H3A                         | 109.500                    | C1—C2—H2D                       | 109.500                    |
| C4—C3—H3B                         | 109.500                    | C1—C2—H2E                       | 109.500                    |
| C4—C3—H3C                         | 109.500                    | C2—C1—H1D                       | 109.500                    |
| N2—C4—H4A                         | 107.200                    | C2—C1—H1E                       | 109.500                    |
| N2—C4—H4B                         | 107.200                    | C2—C1—H1F                       | 109.500                    |
| C3—C4—N2                          | 120.6(12)                  | H1D—C1—H1E                      | 109.500                    |
| C3—C4—H4A                         | 107.200                    | H1D—C1—H1F                      | 109.500                    |
| C3—C4—H4B                         | 107.200                    | H1E—C1—H1F                      | 109.500                    |
| H4A—C4—H4B                        | 106.800                    |                                 |                            |

(i) 1-x, y, z; (ii) 0.5+x, y, 0.5-z; (iii) -0.5+x, y, 0.5-z.

| <b>x = 2.27</b>                    |                        |                    |                            |
|------------------------------------|------------------------|--------------------|----------------------------|
| <b>Atoms 1,2,3</b>                 | <b>Angle 1,2,3 [°]</b> | <b>Atoms 1,2,3</b> | <b>Angle<br/>1,2,3 [°]</b> |
| C14 Br4 <sup>ii</sup> —Bi1—C14 Br4 | 83.678(19)             | H3B—C3—H3C         | 109.500                    |
| Bi1 <sup>iii</sup> —C14 Br4—Bi1    | 165.21(14)             | H1A—C1—H1B         | 109.500                    |
| Bi1 <sup>iii</sup> —C14 Br4—Bi1    | 165.21(14)             | H1A—C1—H1C         | 109.500                    |
| H2A—N2—H2B                         | 109.500                | H1B—C1—H1C         | 109.500                    |
| H2A—N2—H2C                         | 109.500                | C2—C1—H1A          | 109.500                    |
| H2B—N2—H2C                         | 109.500                | C2—C1—H1B          | 109.500                    |
| C4—N2—H2A                          | 109.500                | C2—C1—H1C          | 109.500                    |

|            |           |            |         |
|------------|-----------|------------|---------|
| C4—N2—H2B  | 109.500   | C1—C2—H2D  | 109.500 |
| C4—N2—H2C  | 109.500   | C1—C2—H2E  | 109.500 |
| N2—C4—H4A  | 107.600   | H2D—C2—H2E | 108.100 |
| N2—C4—H4B  | 107.600   | N1—C2—C1   | 110.700 |
| H4A—C4—H4B | 107.000   | N1—C2—H2D  | 109.500 |
| C3—C4—N2   | 119.0(15) | N1—C2—H2E  | 109.500 |
| C3—C4—H4A  | 107.600   | C2—N1—H1D  | 109.500 |
| C3—C4—H4B  | 107.600   | C2—N1—H1E  | 109.500 |
| C4—C3—H3A  | 109.500   | C2—N1—H1F  | 109.500 |
| C4—C3—H3B  | 109.500   | H1D—N1—H1E | 109.500 |
| C4—C3—H3C  | 109.500   | H1D—N1—H1F | 109.500 |
| H3A—C3—H3B | 109.500   | H1E—N1—H1F | 109.500 |
| H3A—C3—H3C | 109.500   |            |         |

(i) 1-x, y, z; (ii) -0.5+x, y, 1.5-z; (iii) 0.5+x, y, 1.5-z.

| $x = 3.125$                        |                 |                                 |                 |
|------------------------------------|-----------------|---------------------------------|-----------------|
| Atoms 1,2,3                        | Angle 1,2,3 [°] | Atoms 1,2,3                     | Angle 1,2,3 [°] |
| Br1 Cl1 <sup>i</sup> —Bi1—Br1 Cl1  | 94.33(5)        | H2A—C2—H2B                      | 107.100         |
| Cl4 Br4 <sup>ii</sup> —Bi1—Cl4 Br4 | 83.361(14)      | Bi1 <sup>iii</sup> —Cl4 Br4—Bi1 | 165.03(9)       |
| Bi1 <sup>iii</sup> —Cl4 Br4—Bi1    | 165.03(9)       | H2C—N2—H2D                      | 109.500         |
| H1A—C1—H1B                         | 109.500         | H2C—N2—H2E                      | 109.500         |
| H1A—C1—H1C                         | 109.500         | H2D—N2—H2E                      | 109.500         |
| H1B—C1—H1C                         | 109.500         | C4—N2—H2C                       | 109.500         |
| C2—C1—H1A                          | 109.500         | C4—N2—H2D                       | 109.500         |
| C2—C1—H1B                          | 109.500         | C4—N2—H2E                       | 109.500         |
| C2—C1—H1C                          | 109.500         | N2—C4—H4A                       | 109.500         |
| H1D—N1—H1E                         | 109.500         | N2—C4—H4B                       | 109.500         |
| H1D—N1—H1F                         | 109.500         | H4A—C4—H4B                      | 108.100         |
| H1E—N1—H1F                         | 109.500         | C3—C4—N2                        | 110.600         |
| C2—N1—H1D                          | 109.500         | C3—C4—H4A                       | 109.500         |
| C2—N1—H1E                          | 109.500         | C3—C4—H4B                       | 109.500         |
| C2—N1—H1F                          | 109.500         | C4—C3—H3A                       | 109.500         |
| C1—C2—N1                           | 118.7(12)       | C4—C3—H3B                       | 109.500         |
| C1—C2—H2A                          | 107.600         | C4—C3—H3C                       | 109.500         |
| C1—C2—H2B                          | 107.600         | H3A—C3—H3B                      | 109.500         |
| N1—C2—H2A                          | 107.600         | H3A—C3—H3C                      | 109.500         |
| N1—C2—H2B                          | 107.600         | H3B—C3—H3C                      | 109.500         |

(i) 1-x, y, z; (ii) -0.5+x, y, 1.5-z; (iii) 0.5+x, y, 1.5-z.

| $x = 5$                   |                 |             |                 |
|---------------------------|-----------------|-------------|-----------------|
| Atoms 1,2,3               | Angle 1,2,3 [°] | Atoms 1,2,3 | Angle 1,2,3 [°] |
| Br1—Bi1—Br1 <sup>i</sup>  | 96.18(5)        | C1—C2—H2A   | 107.700         |
| Br1 <sup>i</sup> —Bi1—Br2 | 89.08(4)        | C1—C2—H2B   | 107.700         |
| Br1—Bi1—Br2               | 89.08(4)        | C2—C1—H1D   | 109.500         |
| Br1 <sup>i</sup> —Bi1—Br3 | 91.98(4)        | C2—C1—H1E   | 109.500         |
| Br1—Bi1—Br3               | 91.98(4)        | C2—C1—H1F   | 109.500         |
| Br1 <sup>i</sup> —Bi1—Br4 | 90.85(3)        | H1D—C1—H1E  | 109.500         |

|                                         |            |            |         |
|-----------------------------------------|------------|------------|---------|
| Br1 <sup>i</sup> —Bi1—Br4 <sup>ii</sup> | 172.93(3)  | H1D—C1—H1F | 109.500 |
| Br1—Bi1—Br4 <sup>ii</sup>               | 90.85(3)   | H1E—C1—H1F | 109.500 |
| Br1—Bi1—Br4                             | 172.93(3)  | H2C—N2—H2D | 109.500 |
| Br2—Bi1—Br3                             | 178.42(5)  | H2C—N2—H2E | 109.500 |
| Br2—Bi1—Br4                             | 90.23(5)   | H2D—N2—H2E | 109.500 |
| Br2—Bi1—Br4 <sup>ii</sup>               | 90.23(5)   | C4—N2—H2C  | 109.500 |
| Br3—Bi1—Br4                             | 88.57(5)   | C4—N2—H2D  | 109.500 |
| Br3—Bi1—Br4 <sup>ii</sup>               | 88.57(5)   | C4—N2—H2E  | 109.500 |
| Br4—Bi1—Br4 <sup>ii</sup>               | 82.120(15) | N2—C4—H4A  | 109.500 |
| Bi1—Br4—Bi1 <sup>iii</sup>              | 164.33(7)  | N2—C4—H4B  | 109.500 |
| H1A—N1—H1B                              | 109.500    | H4A—C4—H4B | 108.100 |
| H1A—N1—H1C                              | 109.500    | C3—C4—N2   | 110.600 |
| H1B—N1—H1C                              | 109.500    | C3—C4—H4A  | 109.500 |
| C2—N1—H1A                               | 109.500    | C3—C4—H4B  | 109.500 |
| C2—N1—H1B                               | 109.500    | C4—C3—H3A  | 109.500 |
| C2—N1—H1C                               | 109.500    | C4—C3—H3B  | 109.500 |
| N1—C2—H2A                               | 107.700    | C4—C3—H3C  | 109.500 |
| N1—C2—H2B                               | 107.700    | H3A—C3—H3B | 109.500 |
| H2A—C2—H2B                              | 107.100    | H3A—C3—H3C | 109.500 |
| C1—C2—N1                                | 118.5(17)  | H3B—C3—H3C | 109.500 |

(i) 1-x, y, z; (ii) -0.5+x, y, 1.5-z; (iii) 0.5+x, y, 1.5-z.

| $x = 0$ (160 K)           |                 |             |                 |
|---------------------------|-----------------|-------------|-----------------|
| Atoms 1,2,3               | Angle 1,2,3 [°] | Atoms 1,2,3 | Angle 1,2,3 [°] |
| C11—Bi1—C12               | 95.10(8)        | N2—C4—H4A   | 109.600         |
| C11—Bi1—C13               | 90.39(8)        | N2—C4—H4B   | 109.600         |
| C11—Bi1—C14 <sup>i</sup>  | 168.70(8)       | N2—C4—C3    | 110.5(12)       |
| C11—Bi1—C14               | 86.46(8)        | H4A—C4—H4B  | 108.100         |
| C11—Bi1—C15               | 90.47(8)        | C3—C4—H4A   | 109.600         |
| C12—Bi1—C13               | 86.72(7)        | C3—C4—H4B   | 109.600         |
| C12—Bi1—C14               | 178.43(8)       | N1—C2—H2D   | 109.200         |
| C12—Bi1—C14 <sup>i</sup>  | 96.11(8)        | N1—C2—H2E   | 109.200         |
| C12—Bi1—C15               | 90.74(8)        | N1—C2—C1    | 112.2(10)       |
| C13—Bi1—C14 <sup>i</sup>  | 88.82(8)        | H2D—C2—H2E  | 107.900         |
| C13—Bi1—C14               | 93.37(8)        | C1—C2—H2D   | 109.200         |
| C13—Bi1—C15               | 177.38(7)       | C1—C2—H2E   | 109.200         |
| C14—Bi1—C14 <sup>i</sup>  | 82.33(3)        | C4—C3—H3A   | 109.500         |
| C15—Bi1—C14               | 89.15(8)        | C4—C3—H3B   | 109.500         |
| C15—Bi1—C14 <sup>i</sup>  | 90.82(8)        | C4—C3—H3C   | 109.500         |
| Bi1—C14—Bi1 <sup>ii</sup> | 150.17(11)      | H3A—C3—H3B  | 109.500         |
| H2A—N2—H2B                | 109.500         | H3A—C3—H3C  | 109.500         |
| H2A—N2—H2C                | 109.500         | H3B—C3—H3C  | 109.500         |
| H2B—N2—H2C                | 109.500         | C2—C1—H1D   | 109.500         |
| C4—N2—H2A                 | 109.500         | C2—C1—H1E   | 109.500         |
| C4—N2—H2B                 | 109.500         | C2—C1—H1F   | 109.500         |
| C4—N2—H2C                 | 109.500         | H1D—C1—H1E  | 109.500         |
| H1A—N1—H1B                | 109.500         | H1D—C1—H1F  | 109.500         |
| H1A—N1—H1C                | 109.500         | H1E—C1—H1F  | 109.500         |

|            |         |                                         |             |
|------------|---------|-----------------------------------------|-------------|
| H1B—N1—H1C | 109.500 | C15 <sup>ii</sup> —C14—C15              | 72.223(70)  |
| C2—N1—H1A  | 109.500 | C13 <sup>ii</sup> —C14—C13 <sup>i</sup> | 77.093(53)  |
| C2—N1—H1B  | 109.500 | C13 <sup>ii</sup> —C14—C13              | 114.330(77) |
| C2—N1—H1C  | 109.500 |                                         |             |

(i) 1.5-x, -0.5+y, z; (ii) 1.5-x, 0.5+y, z.

| <b>x = 0 (90 K)</b>       |                        |                           |                        |
|---------------------------|------------------------|---------------------------|------------------------|
| <b>Atoms 1,2,3</b>        | <b>Angle 1,2,3 [°]</b> | <b>Atoms 1,2,3</b>        | <b>Angle 1,2,3 [°]</b> |
| C11—Bi1—C12               | 94.87(10)              | C1—C2—H2C                 | 109.500                |
| C11—Bi1—C13               | 90.38(9)               | N1—C1—C2                  | 110.1(9)               |
| C11—Bi1—C14 <sup>i</sup>  | 168.89(9)              | N1—C1—H1D                 | 109.600                |
| C11—Bi1—C14               | 85.77(9)               | N1—C1—H1E                 | 109.600                |
| C11—Bi1—C15               | 89.91(11)              | C2—C1—H1D                 | 109.600                |
| C12—Bi1—C13               | 86.38(11)              | C2—C1—H1E                 | 109.600                |
| C12—Bi1—C14               | 179.36(9)              | H1D—C1—H1E                | 108.200                |
| C12—Bi1—C14 <sup>i</sup>  | 96.18(8)               | H4A—C4—H4B                | 109.500                |
| C12—Bi1—C15               | 91.17(13)              | H4A—C4—H4C                | 109.500                |
| C13—Bi1—C14 <sup>i</sup>  | 89.13(8)               | H4B—C4—H4C                | 109.500                |
| C13—Bi1—C14               | 93.61(8)               | C3—C4—H4A                 | 109.500                |
| C13—Bi1—C15               | 177.56(10)             | C3—C4—H4B                 | 109.500                |
| C14—Bi1—C14 <sup>i</sup>  | 83.19(3)               | C3—C4—H4C                 | 109.500                |
| C15—Bi1—C14               | 88.83(11)              | C4—C3—H3A                 | 109.500                |
| C15—Bi1—C14 <sup>i</sup>  | 91.05(9)               | C4—C3—H3B                 | 109.500                |
| Bi1—C14—Bi1 <sup>ii</sup> | 148.34(11)             | H3A—C3—H3B                | 108.100                |
| H1A—N1—H1B                | 109.500                | N2—C3—C4                  | 110.600                |
| H1A—N1—H1C                | 109.500                | N2—C3—H3A                 | 109.500                |
| H1B—N1—H1C                | 109.500                | N2—C3—H3B                 | 109.500                |
| C1—N1—H1A                 | 109.500                | C3—N2—H2D                 | 109.500                |
| C1—N1—H1B                 | 109.500                | C3—N2—H2E                 | 109.500                |
| C1—N1—H1C                 | 109.500                | C3—N2—H2F                 | 109.500                |
| H2A—C2—H2B                | 109.500                | H2D—N2—H2E                | 109.500                |
| H2A—C2—H2C                | 109.500                | H2D—N2—H2F                | 109.500                |
| H2B—C2—H2C                | 109.500                | H2E—N2—H2F                | 109.500                |
| C1—C2—H2A                 | 109.500                | C15—C14—C15 <sup>ii</sup> | 71.979(69)             |
| C1—C2—H2B                 | 109.500                |                           |                        |

(i) 1.5-x, y, -0.5+z; (ii) 1.5-x, y, 0.5+z; (iii) x, y, 1+z.

| <b>x = 1.15 (90 K)</b>           |                        |                    |                        |
|----------------------------------|------------------------|--------------------|------------------------|
| <b>Atoms 1,2,3</b>               | <b>Angle 1,2,3 [°]</b> | <b>Atoms 1,2,3</b> | <b>Angle 1,2,3 [°]</b> |
| C15 Br5—Bi1—C14 Br4 <sup>i</sup> | 90.39(13)              | H00E—C00A—H00F     | 109.500                |
| C13 Br3—Bi1—C14 Br4 <sup>i</sup> | 91.8(2)                | C1—C00A—H00D       | 109.500                |
| C12 Br2—Bi1—C14 Br4 <sup>i</sup> | 165.5(2)               | C1—C00A—H00E       | 109.500                |
| C14 Br4—Bi1—C14 Br4 <sup>i</sup> | 82.90(4)               | C1—C00A—H00F       | 109.500                |
| C13 Br3—Bi1—C14 Br4 <sup>i</sup> | 91.8(2)                | H00J—C00B—H00K     | 109.500                |
| C14 Br4—Bi1—C14 Br4 <sup>i</sup> | 82.90(4)               | H00J—C00B—H00L     | 109.500                |
| C15 Br5—Bi1—C14 Br4 <sup>i</sup> | 90.39(13)              | H00K—C00B—H00L     | 109.500                |
| C11 Br1—Bi1—C14 Br4 <sup>i</sup> | 101.6(2)               | C00C—C00B—H00J     | 109.500                |

|                                  |            |                                  |            |
|----------------------------------|------------|----------------------------------|------------|
| Cl2 Br2—Bi1—Cl4 Br4 <sup>i</sup> | 165.5(2)   | C00C—C00B—H00K                   | 109.500    |
| Cl1 Br1—Bi1—Cl4 Br4 <sup>i</sup> | 101.6(2)   | C00C—C00B—H00L                   | 109.500    |
| Bi1—Cl4 Br4—Bi1 <sup>iii</sup>   | 150.22(17) | N009—C00C—H00M                   | 108.400    |
| H00A—N008—H00B                   | 109.500    | N009—C00C—H00N                   | 108.400    |
| H00A—N008—H00C                   | 109.500    | C00B—C00C—N009                   | 115.7(18)  |
| H00B—N008—H00C                   | 109.500    | C00B—C00C—H00M                   | 108.400    |
| C1—N008—H00A                     | 109.500    | C00B—C00C—H00N                   | 108.400    |
| C1—N008—H00B                     | 109.500    | H00M—C00C—H00N                   | 107.400    |
| C1—N008—H00C                     | 109.500    | N008—C1—C00A                     | 115.0(19)  |
| H00G—N009—H00H                   | 109.500    | N008—C1—H1A                      | 108.500    |
| H00G—N009—H00I                   | 109.500    | N008—C1—H1B                      | 108.500    |
| H00H—N009—H00I                   | 109.500    | C00A—C1—H1A                      | 108.500    |
| C00C—N009—H00G                   | 109.500    | C00A—C1—H1B                      | 108.500    |
| C00C—N009—H00H                   | 109.500    | H1A—C1—H1B                       | 107.500    |
| C00C—N009—H00I                   | 109.500    | Bi1—Cl4 Br4—Bi1 <sup>iii</sup>   | 150.22(17) |
| H00D—C00A—H00E                   | 109.500    | Cl5 Br5 <sup>iii</sup> —Cl4 Br4— |            |
| H00D—C00A—H00F                   | 109.500    | Cl5 Br5                          | 72.331(84) |

(i) 1.5-x, y, 0.5+z; (ii) x, y, -1+z; (iii) 1.5-x, y, -0.5+z.

| <b>x = 2.12 (90 K)</b>            |                        |                       |                        |
|-----------------------------------|------------------------|-----------------------|------------------------|
| <b>Atoms 1,2,3</b>                | <b>Angle 1,2,3 [°]</b> | <b>Atoms 1,2,3</b>    | <b>Angle 1,2,3 [°]</b> |
| Br5 Cl5—Bi1—Cl4 Br4 <sup>i</sup>  | 89.0(2)                | N1—C6—H6A             | 109.000                |
| Cl1 Br1—Bi1—Cl4 Br4 <sup>i</sup>  | 102.9(3)               | N1—C6—H6B             | 109.000                |
| Br2 Cl2—Bi1—Cl4 Br4 <sup>i</sup>  | 165.8(3)               | C4—C6—H6A             | 109.000                |
| Cl3 Br3—Bi1—Cl4 Br4 <sup>i</sup>  | 92.2(3)                | C4—C6—H6B             | 109.000                |
| Cl4 Br4 <sup>i</sup> —Bi1—Cl4 Br4 | 82.84(8)               | H6A—C6—H6B            | 107.800                |
| Br2 Cl2—Bi1—Cl4 Br4 <sup>i</sup>  | 165.8(3)               | H3A—C3—H3B            | 109.500                |
| Cl3 Br3—Bi1—Cl4 Br4 <sup>i</sup>  | 92.2(3)                | H3A—C3—H3C            | 109.500                |
| Cl1 Br1—Bi1—Cl4 Br4 <sup>i</sup>  | 102.9(3)               | H3B—C3—H3C            | 109.500                |
| Br5 Cl5—Bi1—Cl4 Br4 <sup>i</sup>  | 89.0(2)                | C1—C3—H3A             | 109.500                |
| Bi1 <sup>ii</sup> —Cl4 Br4—Bi1    | 155.6(4)               | C1—C3—H3B             | 109.500                |
| Bi1 <sup>ii</sup> —Cl4 Br4—Bi1    | 155.6(4)               | C1—C3—H3C             | 109.500                |
| H1A—N1—H1B                        | 109.500                | H2A—N2—H2B            | 109.500                |
| H1A—N1—H1C                        | 109.500                | H2A—N2—H2C            | 109.500                |
| H1B—N1—H1C                        | 109.500                | H2B—N2—H2C            | 109.500                |
| C6—N1—H1A                         | 109.500                | C1—N2—H2A             | 109.500                |
| C6—N1—H1B                         | 109.500                | C1—N2—H2B             | 109.500                |
| C6—N1—H1C                         | 109.500                | C1—N2—H2C             | 109.500                |
| H4A—C4—H4B                        | 109.500                | C3—C1—H1D             | 104.400                |
| H4A—C4—H4C                        | 109.500                | C3—C1—H1E             | 104.400                |
| H4B—C4—H4C                        | 109.500                | N2—C1—C3              | 131.(9)                |
| C6—C4—H4A                         | 109.500                | N2—C1—H1D             | 104.400                |
| C6—C4—H4B                         | 109.500                | N2—C1—H1E             | 104.400                |
| C6—C4—H4C                         | 109.500                | H1D—C1—H1E            | 105.600                |
| N1—C6—C4                          | 113.(3)                | Br5 Cl5—Cl4 Br4—      |                        |
|                                   |                        | Br5 Cl5 <sup>ii</sup> | 75.479(168)            |

((i) 1.5-x, y, -0.5+z; (ii) 1.5-x, y, 0.5+z.

| $x=5$ (90 K)              |                 |                            |                 |
|---------------------------|-----------------|----------------------------|-----------------|
| Atoms 1,2,3               | Angle 1,2,3 [°] | Atoms 1,2,3                | Angle 1,2,3 [°] |
| Br1—Bi1—Br3               | 87.8(2)         | C2—C3—H3B                  | 108.600         |
| Br1—Bi1—Br4               | 172.7(3)        | C3—C2—H2D                  | 109.500         |
| Br1—Bi1—Br4 <sup>i</sup>  | 90.7(3)         | C3—C2—H2E                  | 109.500         |
| Br1—Bi1—Br5               | 93.4(2)         | C3—C2—H2F                  | 109.500         |
| Br2—Bi1—Br1               | 96.14(6)        | H2D—C2—H2E                 | 109.500         |
| Br2—Bi1—Br3               | 90.4(2)         | H2D—C2—H2F                 | 109.500         |
| Br2—Bi1—Br4 <sup>i</sup>  | 173.1(3)        | H2E—C2—H2F                 | 109.500         |
| Br2—Bi1—Br4               | 91.1(3)         | H1A—C1—H1B                 | 109.500         |
| Br2—Bi1—Br5               | 90.7(2)         | H1A—C1—H1C                 | 109.500         |
| Br3—Bi1—Br4 <sup>i</sup>  | 89.70(15)       | H1B—C1—H1C                 | 109.500         |
| Br3—Bi1—Br4               | 90.88(14)       | C4—C1—H1A                  | 109.500         |
| Br3—Bi1—Br5               | 178.32(5)       | C4—C1—H1B                  | 109.500         |
| Br4—Bi1—Br4 <sup>i</sup>  | 82.055(15)      | C4—C1—H1C                  | 109.500         |
| Br5—Bi1—Br4               | 87.82(16)       | C1—C4—H4A                  | 109.500         |
| Br5—Bi1—Br4 <sup>i</sup>  | 89.06(15)       | C1—C4—H4B                  | 109.500         |
| Bi1—Br4—Bi1 <sup>ii</sup> | 164.47(8)       | H4A—C4—H4B                 | 108.100         |
| H2A—N2—H2B                | 109.500         | N4—C4—C1                   | 110.600         |
| H2A—N2—H2C                | 109.500         | N4—C4—H4A                  | 109.500         |
| H2B—N2—H2C                | 109.500         | N4—C4—H4B                  | 109.500         |
| C3—N2—H2A                 | 109.500         | C4—N4—H4C                  | 109.500         |
| C3—N2—H2B                 | 109.500         | C4—N4—H4D                  | 109.500         |
| C3—N2—H2C                 | 109.500         | C4—N4—H4E                  | 109.500         |
| N2—C3—H3A                 | 108.600         | H4C—N4—H4D                 | 109.500         |
| N2—C3—H3B                 | 108.600         | H4C—N4—H4E                 | 109.500         |
| H3A—C3—H3B                | 107.500         | H4D—N4—H4E                 | 109.500         |
| C2—C3—N2                  | 115.(2)         | Br5 <sup>ii</sup> —Br4—Br5 | 77.491(198)     |
| C2—C3—H3A                 | 108.600         |                            |                 |

(i) 0.5-x, y, -0.5+z; (ii) 0.5-x, y, 0.5+z.

## SEM



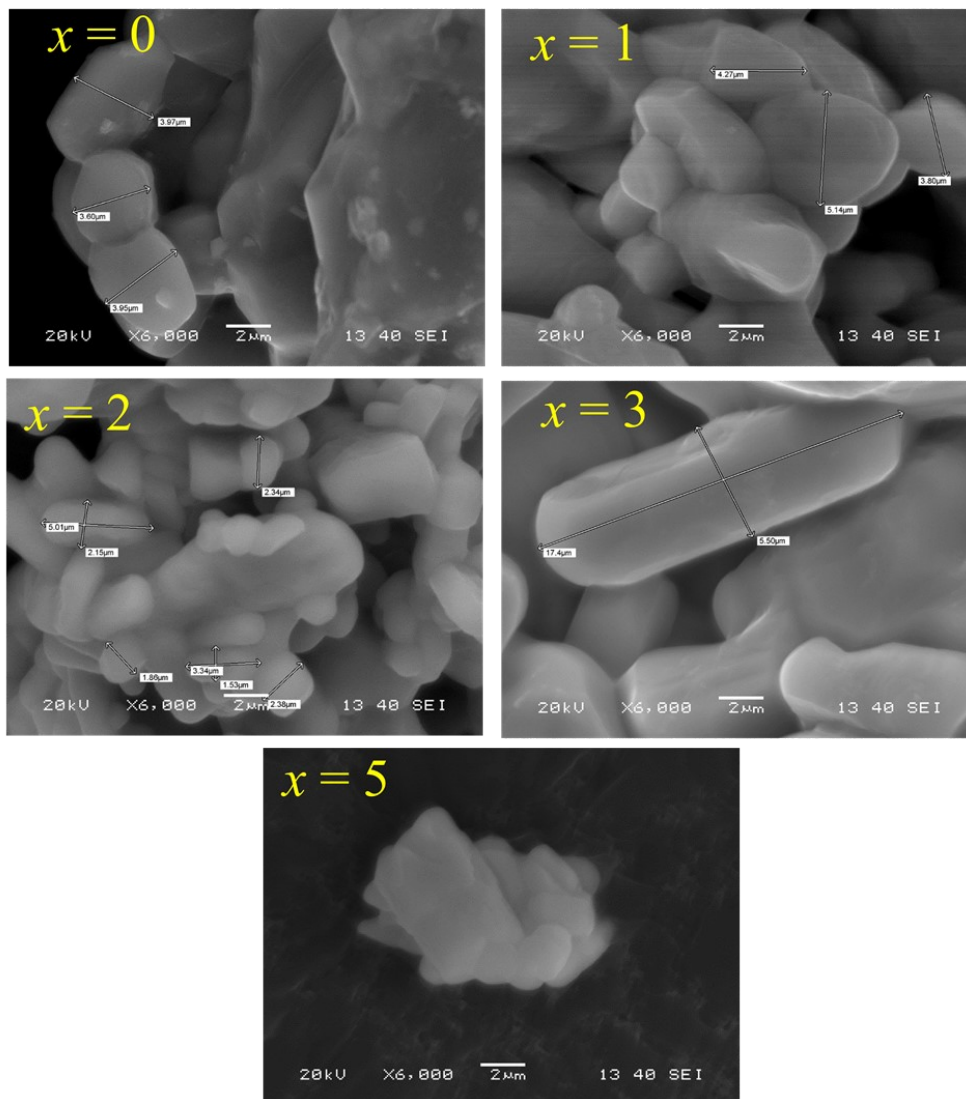

**Figure S1:** SEM images of  $(\text{C}_2\text{H}_5\text{NH}_3)_2\text{BiCl}_{5-x}\text{Br}_x$  series.

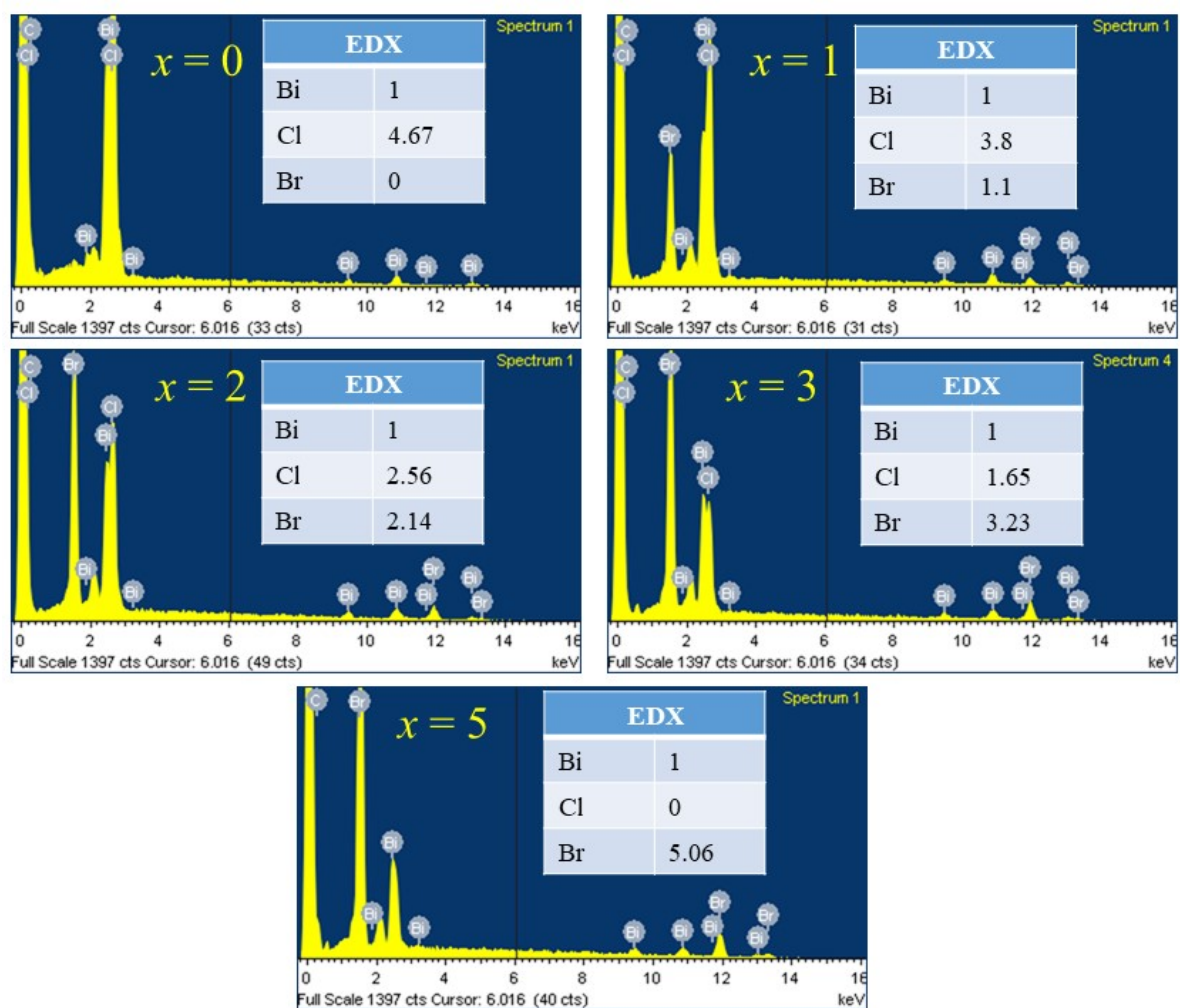

**Figure S2:** EDX spectra from SEM study of  $(C_2H_5NH_3)_2BiCl_{5-x}Br_x$  series.

## TGA

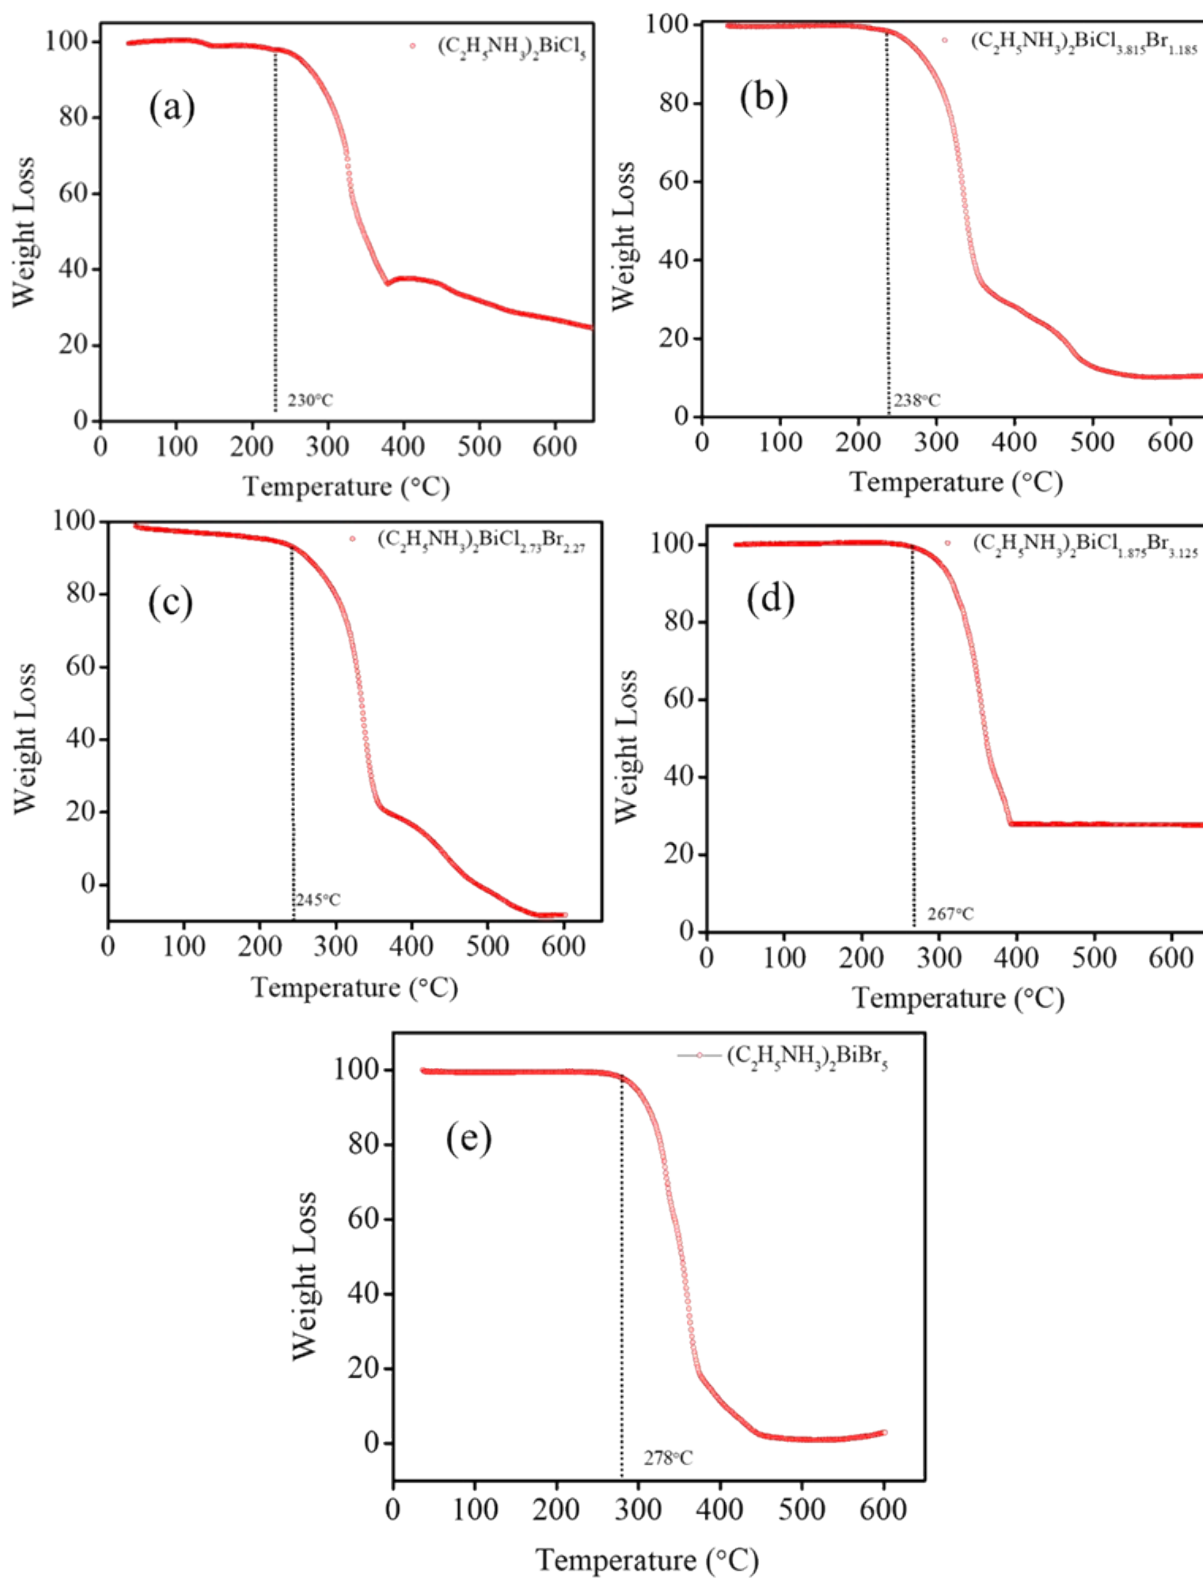

**Figure S3:** TGA data of  $(\text{C}_2\text{H}_5\text{NH}_3)_2\text{BiCl}_{5-x}\text{Br}_x$  series.

## Dielectric Measurement:

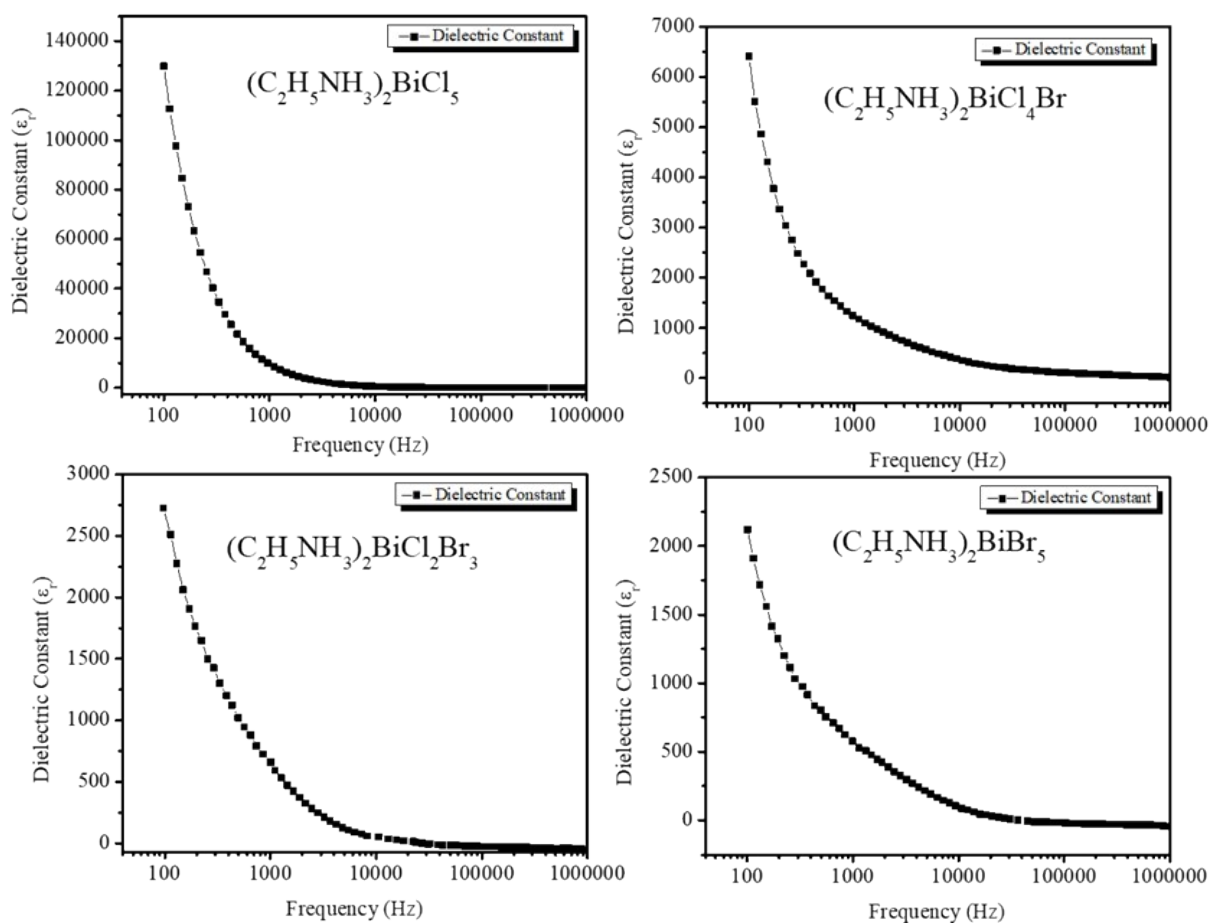

**Figure S4:** Dielectric constant Vs frequency at room temperature for selected compositions from  $(C_2H_5NH_3)_2BiCl_{5-x}Br_x$  series.

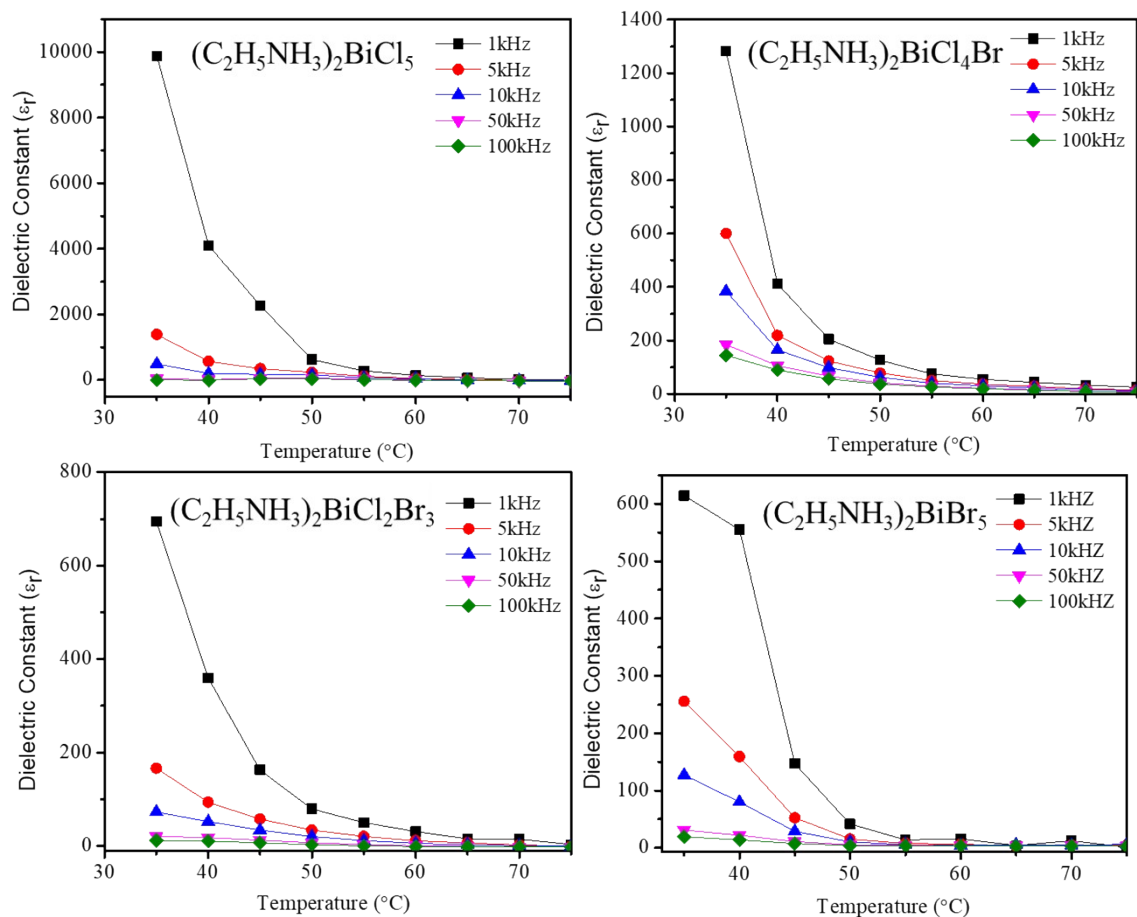

**Figure S5:** Dielectric constant Vs temperature at various frequencies for selected compositions from  $(C_2H_5NH_3)_2BiCl_{5-x}Br_x$  series.

Raman:

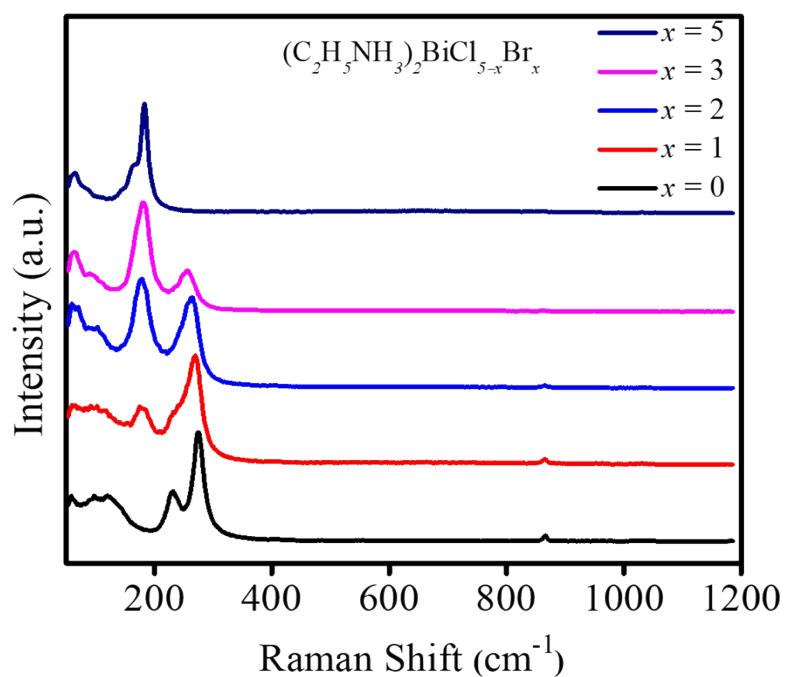

**Figure S6:** Raman bands of  $(C_2H_5NH_3)_2BiCl_{5-x}Br_x$  series showing no bands after 350  $cm^{-1}$

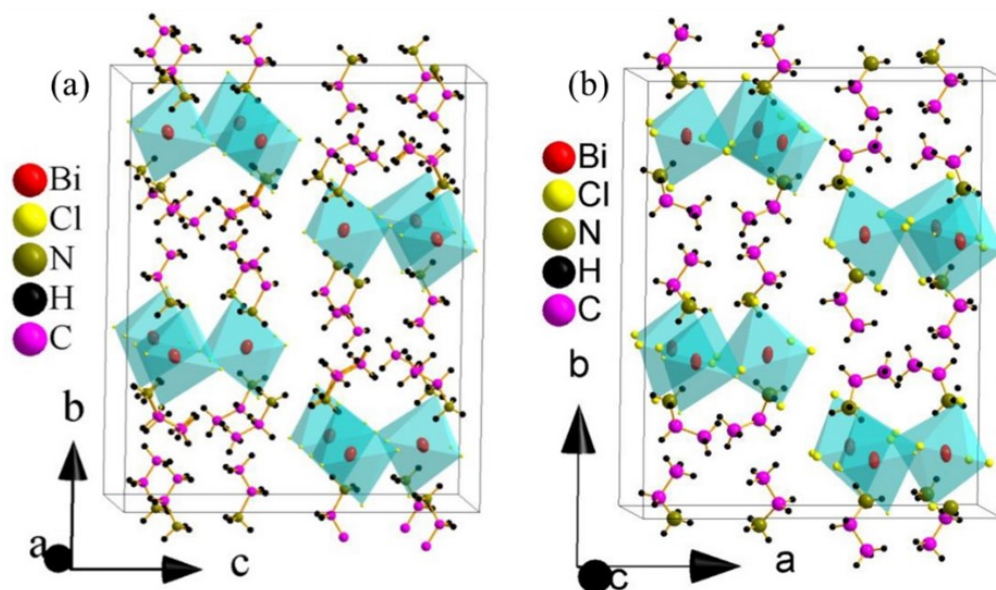

**Figure S7.** Crystal Structure of (a) RT Phase (Space gr. *Cmca*), (b) LT Phase (Space gr. *Aba2*) of  $(\text{C}_2\text{H}_5\text{NH}_3)_2\text{BiCl}_5$ .

Partial DOS:

$(\text{C}_2\text{H}_5\text{NH}_3)_2\text{BiCl}_5$

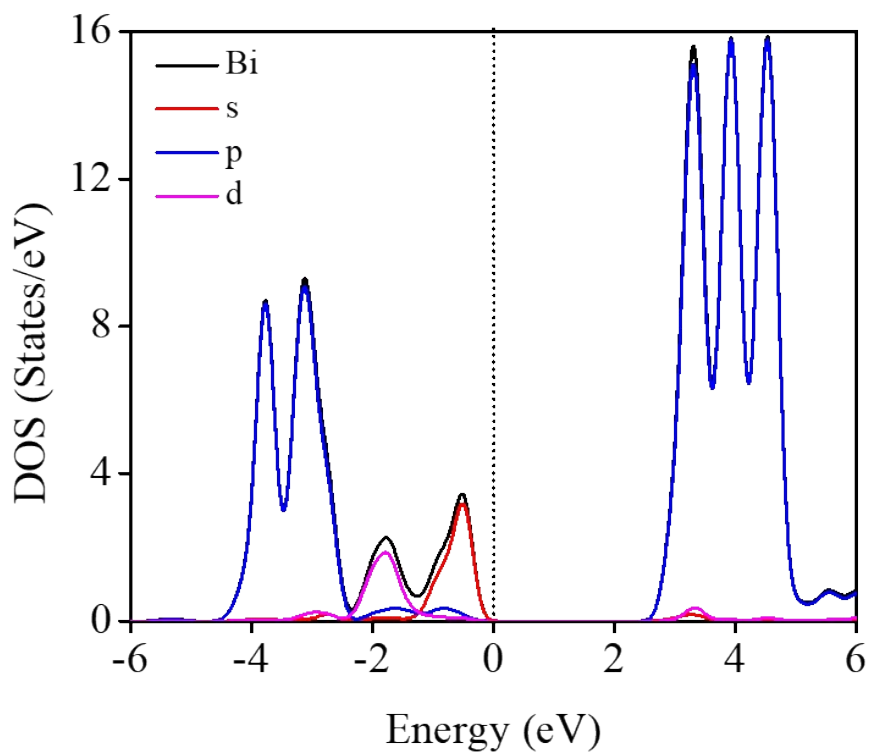

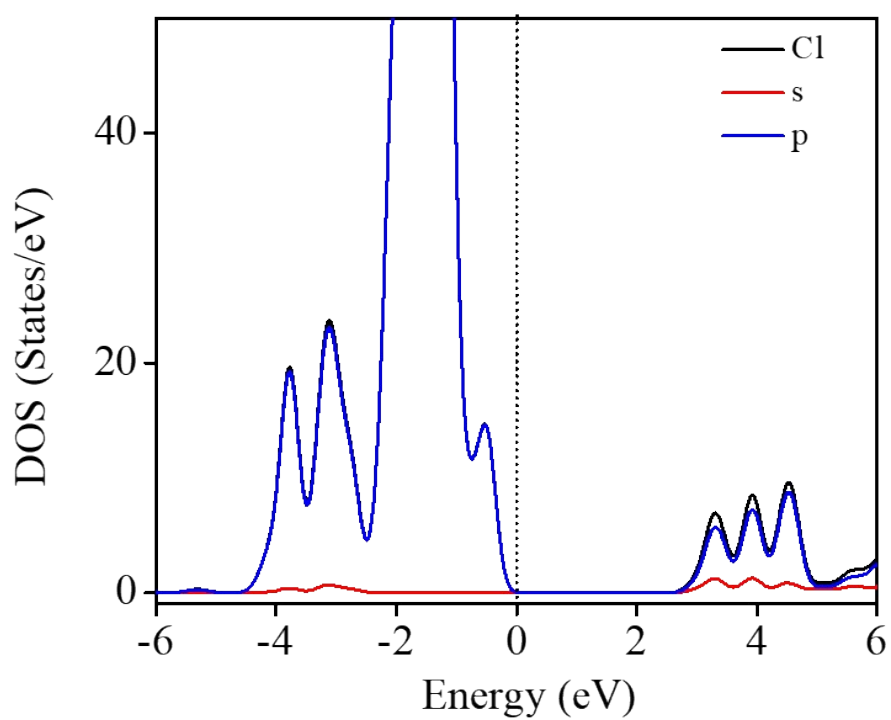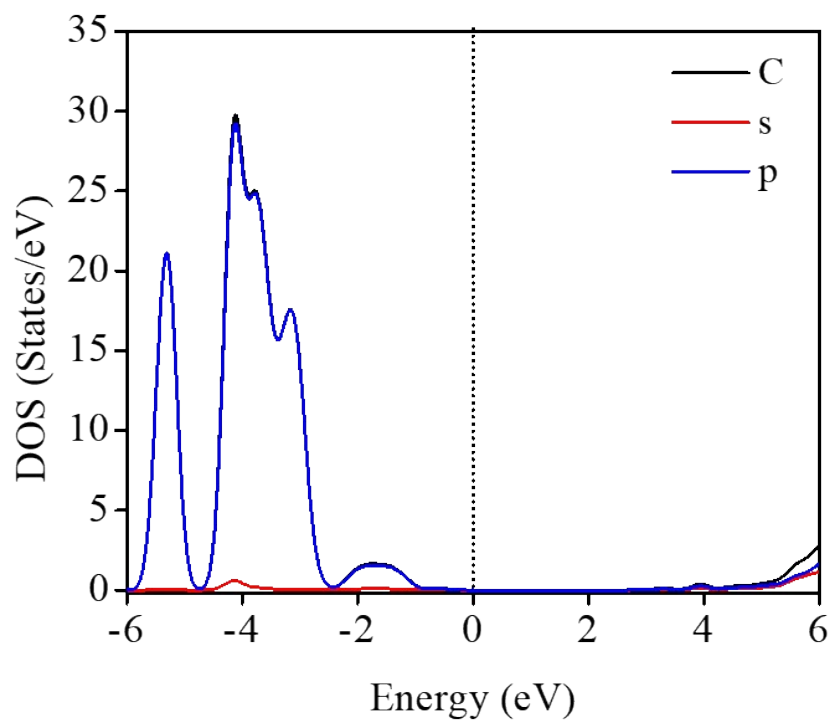

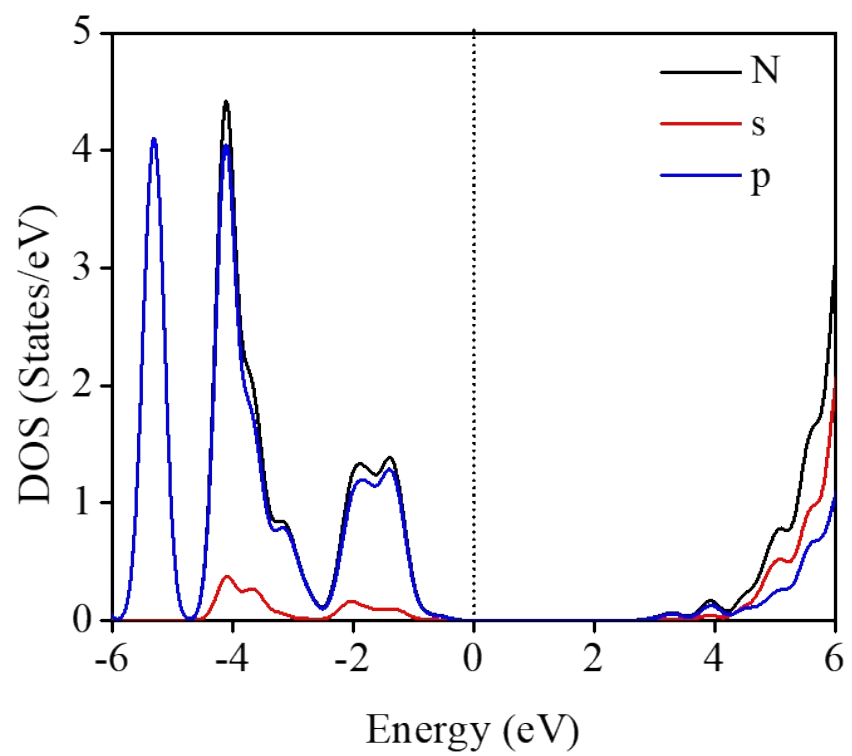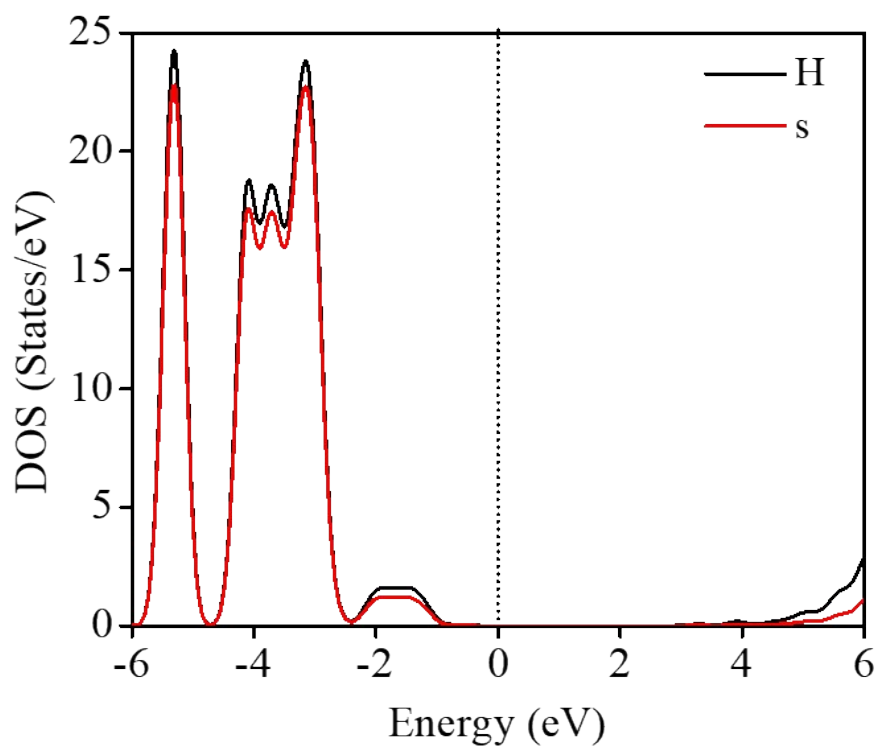

**Figure S8:** Partial DOS of  $(\text{C}_2\text{H}_5\text{NH}_3)_2\text{BiCl}_5$  compound.



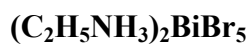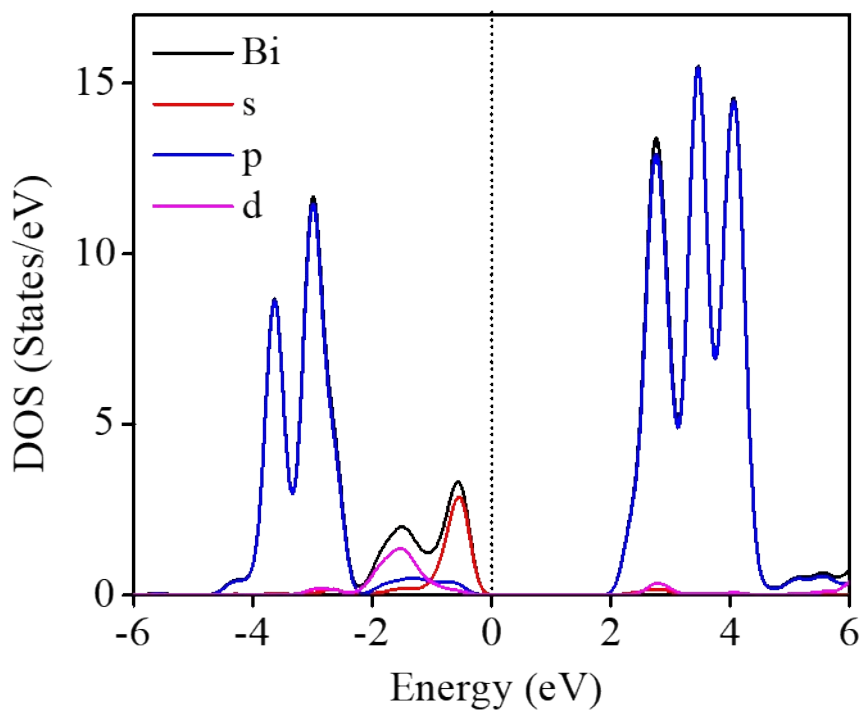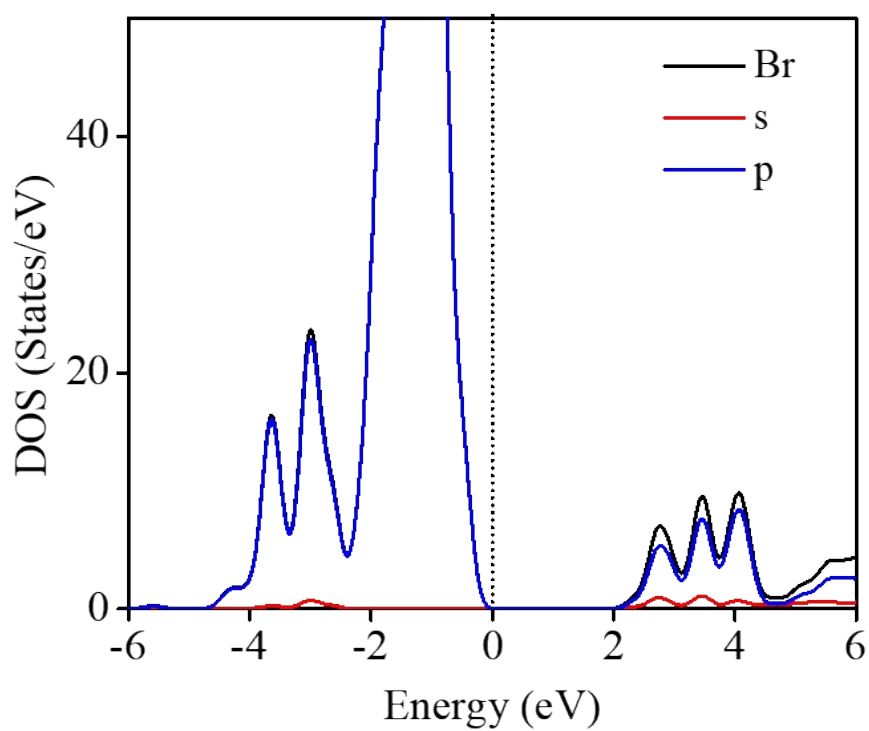

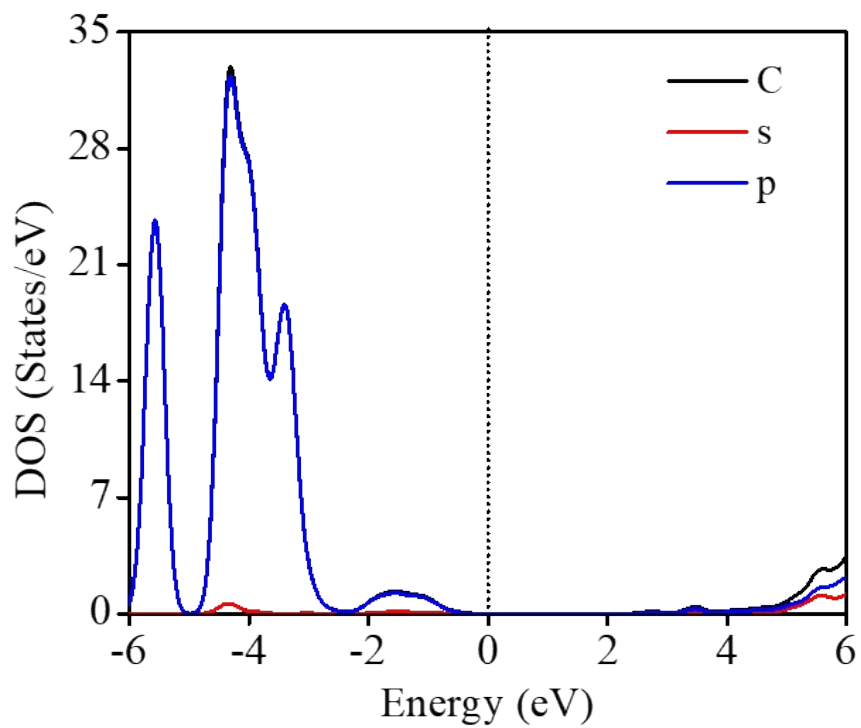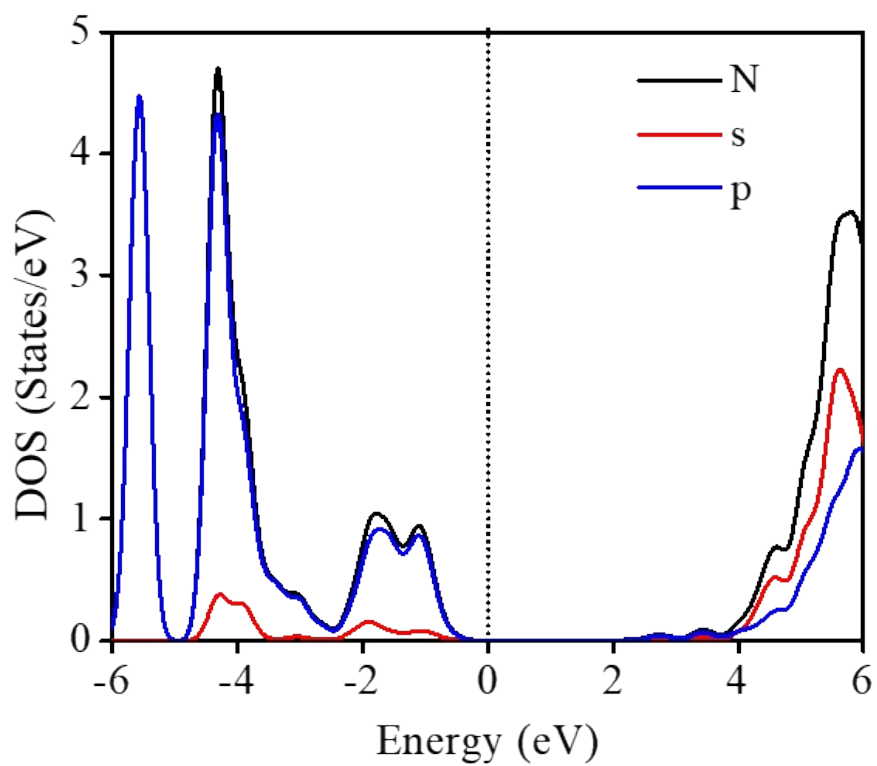

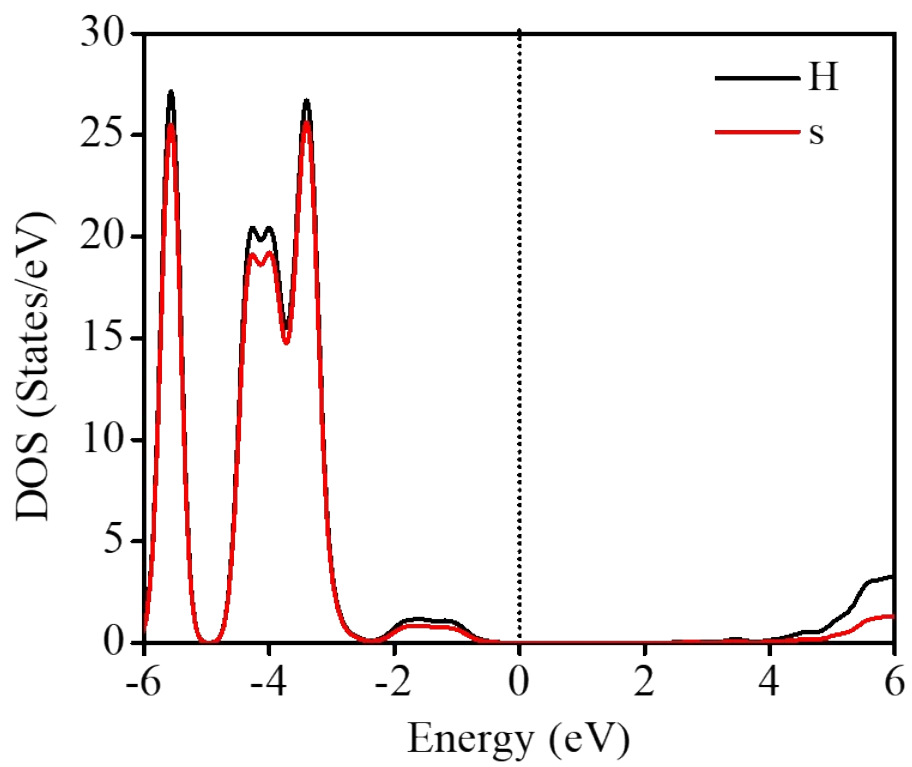

**Figure S9:** Partial DOS of  $(\text{C}_2\text{H}_5\text{NH}_3)_2\text{BiBr}_5$  compound.
